# Supplementary material for: Evaluating ChatGPT-4’s historical accuracy: a case study on the origins of SWOT analysis
Source: Front Artif Intell. 2024 May 3;7:1402047. doi: 10.3389/frai.2024.1402047 (PMC11100993; doi:10.3389/frai.2024.1402047)
Supplement: Supplementary file 1 [file Table_1.XLSX]

## Sheet: Preparation
		Preparation
		There are 2 main variables that control the level of creativity (or randomness) of the ChatGPT 4 API from OpenAI.com: Temperature and Top_P.
		The Temperature variable setting ranges between 0.0 - 2.0, the Top_P variable ranges between 0.0 - 1.0.
		When prompting the API with a Python script, only 1 variable can be set (either Temperature or Top_P)
		The goal of the experiment is to compare the quality of responses for different settings of the 2 main variables.
		Default settings (Temperate 1.0; Top_P 0.5) and a strict setting (Temperature 0.2; Top_P 0.1).
		When the variables are set to a stricter setting, more reliable outcomes in the reponses are expected compared to the default setting.
		In addition, it is unclear which variable setting yields the best (most trustworthy results).
		Steps for data gathering and analysis
	1	Select 50 relevant publications on SWOT analysis (1965-2019).
	2	Extract all relevant data for grading the response from ChatGPT 4 (Author(s), Outlet, Pages, Title & Year) and make a Reference list for grading responses.
	3	Make a list with standard questions (50 first authors)
	4	Develop and test the python script and the parameters
	5	Prompt the API by loading the standard questions from an Excel file
	6	Write the responses to a seperate Excel file
	7	Grade the responses (Grading results) on a binary scale (0-1) for the different settings (default and strict)
	8	Check the responses for hallucinations (mark with an X).
	9	Check for traces of training data sources in the responses
	10	Investigate/verify traces of training data sources
	11	Check the availability of scholarly publications on the internet, publishers and Researchgate
	12	Make a descriptive statitiscal analysis (Statistics) with normal distributions for different settings (default and strict)
	13	Make descriptive Tables
	14	Develop propositions for future research

## Sheet: 50 first authors
1	Please provide references to the conceptual contribution(s) of Robert F. Stewart to SWOT analysis
2	Please provide references to the conceptual contribution(s) of J. Douglas McConnell to SWOT analysis
3	Please provide references to the conceptual contribution(s) of Kjell-Arne Ringbakk to SWOT analysis
4	Please provide references to the conceptual contribution(s) of Ian A. Mottershaw to SWOT analysis
5	Please provide references to the conceptual contribution(s) of Albert S. Humphrey to SWOT analysis
6	Please provide references to the conceptual contribution(s) of John Argenti to SWOT analysis
7	Please provide references to the conceptual contribution(s) of H. Igor Ansoff to SWOT analysis
8	Please provide references to the conceptual contribution(s) of George A. Steiner to SWOT analysis
9	Please provide references to the conceptual contribution(s) of Kenneth R. Andrews to SWOT analysis
10	Please provide references to the conceptual contribution(s) of Heinz Weihrich to SWOT analysis
11	Please provide references to the conceptual contribution(s) of George S. Day to SWOT analysis
12	Please provide references to the conceptual contribution(s) of Fred R. David to SWOT analysis
13	Please provide references to the conceptual contribution(s) of Thomas L. Wheelen to SWOT analysis
14	Please provide references to the conceptual contribution(s) of Eliza Ching-Yick Tse to SWOT analysis
15	Please provide references to the conceptual contribution(s) of Jay B. Barney to SWOT analysis
16	Please provide references to the conceptual contribution(s) of T. Richard Dealty to SWOT analysis
17	Please provide references to the conceptual contribution(s) of Laetitia Radder to SWOT analysis
18	Please provide references to the conceptual contribution(s) of Geert-Jan Houben to SWOT analysis
19	Please provide references to the conceptual contribution(s) of Mikko Kurttila to SWOT analysis
20	Please provide references to the conceptual contribution(s) of Andrew Sai On Ko to SWOT analysis
21	Please provide references to the conceptual contribution(s) of Bernhard Gibis to SWOT analysis
22	Please provide references to the conceptual contribution(s) of Erhard K. Valentin to SWOT analysis
23	Please provide references to the conceptual contribution(s) of Rodney A. Stewart to SWOT analysis
24	Please provide references to the conceptual contribution(s) of Jan Emblemsvåg to SWOT analysis
25	Please provide references to the conceptual contribution(s) of Jyrki Kangas to SWOT analysis
26	Please provide references to the conceptual contribution(s) of Y.K. Ip to SWOT analysis
27	Please provide references to the conceptual contribution(s) of Milorad M. Novicevic to SWOT analysis
28	Please provide references to the conceptual contribution(s) of H. Mollenhorst to SWOT analysis
29	Please provide references to the conceptual contribution(s) of George Panagiotou to SWOT analysis
30	Please provide references to the conceptual contribution(s) of H. Shinno to SWOT analysis
31	Please provide references to the conceptual contribution(s) of İhsan Yüksel to SWOT analysis
32	Please provide references to the conceptual contribution(s) of Sepehr Ghazinoory to SWOT analysis
33	Please provide references to the conceptual contribution(s) of Jen Hetzel Silbert to SWOT analysis
34	Please provide references to the conceptual contribution(s) of Noga Collins Kreiner to SWOT analysis
35	Please provide references to the conceptual contribution(s) of Leung Chee Koo to SWOT analysis
36	Please provide references to the conceptual contribution(s) of Truong‐Van Luu to SWOT analysis
37	Please provide references to the conceptual contribution(s) of Lee Kuo-liang to SWOT analysis
38	Please provide references to the conceptual contribution(s) of Alex Coman to SWOT analysis
39	Please provide references to the conceptual contribution(s) of Weisheng Lu to SWOT analysis
40	Please provide references to the conceptual contribution(s) of E.K. Zavadskas to SWOT analysis
41	Please provide references to the conceptual contribution(s) of M. Konstanciak to SWOT analysis
42	Please provide references to the conceptual contribution(s) of Ravi Agarwal to SWOT analysis
43	Please provide references to the conceptual contribution(s) of Gaston de los Reyes to SWOT analysis
44	Please provide references to the conceptual contribution(s) of Hanna-Leena Pesonen of to SWOT analysis
45	Please provide references to the conceptual contribution(s) of Olivier Mesly to SWOT analysis
46	Please provide references to the conceptual contribution(s) of J. Siciliano to SWOT analysis
47	Please provide references to the conceptual contribution(s) of Chun-Min Kuo to SWOT analysis
48	Please provide references to the conceptual contribution(s) of Boonyarat Phadermrod to SWOT analysis
49	Please provide references to the conceptual contribution(s) of Charis Vlados to SWOT analysis
50	Please provide references to the conceptual contribution(s) of Fabiano Dalpiaz to SWOT analysis

## Sheet: Reference list
Nr.	Variation	Author(s)	Outlet	Pages	Title	Year
01	SOFT Approach	Stewart, R.F., Benepe, O.J. & Mitchell, A.	Long Range Planning Service, SRI	1-26	Formal Planning - The Staff Planner's Role at Start-Up	1965
02	Organized Entrepreneurship	McConnell, J.D.	Long Range Planning	2-6	Strategic planning, One workable approach	1971
03	PIPOS framework	Ringbakk, K.-A.	Long Range Planning	10-20	The corporate life cycle - An international point of view	1972
04	SWOT analysis	Stait, N.H.	Industrial and commerical training	325-330	Management training and the smaller company swot analysis	1972
05	Participative planning	Humphrey, A.S.	Long Range Planning	45-51	Getting management commitment to planning - A new approach	1974
06	SWOT analysis	Argenti, J.	Thomas Nelson & Sons Ltd.	1-316	Systematic Corporate Planning	1974
07	Treat/Opportunity analysis	Ansoff, H.I.	California Management Review	21-33	Managing strategic surprise by response to weak signals	1975
08	WOTS-UP	Steiner, G.A. & Miner, J.B.	MacMillan Publishing Co., Ltd.	3-1014	Management Policy and Strategy - Text, Readings and Cases	1977
09	LCAG framework	Christensen, C.R., Andrews, K.R. & Bower, J.L.	Richard D. Irwin, Inc.	3-846	Business Policy - Text and Cases (4th edition)	1978
10	TOWS matrix	Weihrich, H.	Long Range Planning	1-19	The TOWS matrix - A tool for situational analysis	1982
11	SWOPT	Day, G.S.	West Publishing Company	1-237	Strategic Market Planner - The Pursuit of Competitive Advantage	1984
12	QSPM	David, F.R.	Long Range Planning	102-107	The Strategic planning matrix, a quantitative approach	1986
13	SFAS matrix	Wheelen, T.L. & Hunger, J.D.	SAM Advanced Management Journal	4-12	Using the strategic audit	1987
14	SWA	Che, E. C-Y.	Journal of Hospitality & Tourism Research	57-72	Defining corporate strenghts and weaknesses: Is it essential for succesful strategy implementation?	1988
15	VRIO framework	Barney, J.B.	Journal of Management	99-120	Firm resources and sustained competitive advantage	1991
16	Dynamic SWOT Analysis	Dealtry, T.R.	DSA Publications	2-120	Dynamic SWOT Analysis - The Developer's Guide	1992
17	SPACE Matrix	Radder, L. & Louw, L.	Long Range Planning	549-559	SPACE matrix: A tool for calibrating competition	1998
18	Knowledge-based SWOT Analysis	Houben, G., Lenie, K. & Vanhoof, K.	Decision Support Systems	125-135	Knowledge-based SWOT-analysis system as an instrument for strategic planning in small and medium sized enterprises	1999
19	A'WOT	Kurtilla, M, Pesonen, M., Kangas, J. & Kajanus, M.	Forest Policy and Economics	41-52	Utilizing the analytic hierarchy process. (AHP) in SWOT analysis - a hybrid method and its application to a forest-certification case	2000
20	Strategy Formulation Framework (SWOT, BSC & QFD)	Sai On Ko, A. & Lee, S.F.	Managerial Auditing Journal	469-477	Implementing the strategic formulation framework for the banking industry of Hong Kong	2000
21	Group-based SWOT analysis	Gibis, B., Artiles, J., Corabian, P., Meiesaar, K., Koppel, A., Jacobs, P., Serrano, P. & Menon, D.	Health Policy	27-35	Application of strengths, weaknesses, opportunities and threats analysis in the development of a health technology assessment program	2001
22	Resource-based SWOT	Valentin, E.K.	Journal of Marketing Theory and Practice	54-69	SWOT Analysis From an Resource-Based View	2001
23	SWOT & AHP analysis	Stewart, R.A., Mohamed, S. & Daet, R.	Automation in construction	681-694	Strategic implementation of IT/IS projects in construction: a case study	2002
24	SWOT & SRA approach	Emblemsvåg, J. & Kjølstad, L.E.	Management Decision	842-852	Strategic risk analysis - a field version	2002
25	S-O-S approach	Kangas, J., Kurtilla, M., Kajanus, M. & Kangas, A.	Journal of Environmental Management	349-358	Evaluating the management strategies for a forestland estate - the S-O-S approach	2003
26	STAW	Ip, Y.K. & Koo, L.C.	Managerial Auditing Journal	533-543	BSQ strategic framework formulation - a hybrid of balanced scorecard, SWOT analysis and Quality Function Deployment	2004
27	Dual-perspective SWOT	Novicevic, M.M., Harvey, M., Autry, C.W. & Bond III, E.U.	Marketing Intelligence & Planning	84-94	Dual-perspective SWOT: a synthesis of marketing intelligence and planning	2004
28	Participatory strengths, weaknesses, opportunities and threats (SWOT) analysis	Mollenhorst, H. & de Boer, I.J.M.	Outlook on Agriculture	267-276	Identifying sustainability issues using participatory SWOT analysis: A case study of egg production in the Netherlands	2004
29	TOSF	Panagiotou, G. & van Wijnen, R.	Marketing Intelligence & Planning	155-171	The "telescopic observations" framework: an attainable strategic tool	2005
30	Quantitative SWOT analysis	Shinno, H., Yoshioka, H., Marpaung, S. & Hachiga, S.	Journal of Engineering Design	251-258	Quantitative SWOT analysis on global competiveness of machine tool industry	2006
31	ANP-SWOT	Yüksel, İ. & Daǧdeviren, M.	Information Sciences	3364-3382	Using the analytic network process (ANP) in SWOT analysis - A case study for a textile firm	2007
32	Fuzzy SWOT	Ghazinoory, S., Zadeh, A.E. & Memariani, A.	Journal of Intelligent and Fuzzy Systems	99-108	Fuzzy SWOT Analysis	2007
33	SOAR	Silbert, J.H. & Silbert, T.	Spartina Consulting	1-4	SOARing from SWOT - four lessons in strategic planning done right	2007
34	Enhanced SWOT analysis framework	Collins-Kreiner, N. & Wall, G.	Tourism	51-63	Evaluating tourism potential: A SWOT analysis of the Western Negev, Israel	2007
35	Double house of Quality	Koo, L.C. & Koo, H.	World Review of Entrepreneurship, Management and Sustainability	62-78	Holistic approach for diagnosing, prioritising, implementing and monitoring effective strategies through synergetic fusion of SWOT, Balanced Scorecard and QFD	2007
36	The BSC-oriented SWOT matrix	Luu, T-V., Kim, S-Y., Cao, H-L. & Park Y-M.	Construction Management and Economics	373-386	Performance measurement of construction firms in developing countries	2008
37	Fuzzy Quantitative SWOT	Lee, K-L. & Lin, S-C.	Information Sciences	531-549	A fuzzy quantified SWOT procedure for environmental evaluation of an international distribution center	2008
38	Focused SWOT methodology	Coman, A. & Ronen, B.	Internationl Journal of Production Research	5677-5689	Focused SWOT: Diagnosing critical strengths and weaknesses	2009
39	Augemented SWOT analysis	Lu, W.	Journal of Construction Engineering and Management	1317-1328	Improved SWOT Approach for Conducting Strategic Planning in the Construction Industry	2010
40	AHP-SWOT	Zavadskas, E.K., Turksis, Z. & Tamošaitienė, J.	Archives of Civil and Mechanical Engineering	1063-1082	Selection of construction enterprises management strategy based on SWOT and multi-criteria analysis	2011
41	SWOT 3 x 3 matrix	Konstanciak, M.	Archives of Materials Science and Engineering	69-74	Analysis of technological strategies on the example of the production of the tramway wheels	2012
42	Meta-SWOT	Agarwal, R., Grassl, W. & Pahl, J.	Journal of Business Strategy	12-21	Meta-SWOT: introducing a new strategic planning tool	2012
43	SWONT	de los Reyes, G.	Academy of Management Proceedings	1-29	Fulfilling the promise of shared value with SWONT	2014
44	Climate SWOT	Pesonen, H.L. & Horn, S.	The International Journal of Life Cycle Assessment	1780-1792	Evaluating the Sustainability SWOT as a streamlined tool for life cycle sustainability assessment	2014
45	SVOR	Mesley, O.	CRC Press	1-590	Tools for Uncovering Points of Vulnerability	2016
46	SWUF analysis	Siciliano, J.	Academy of Business Education Journal	201-208	SWUF Analysis: A New Way to Avoid the “Opportunity” Error of SWOT	2016
47	SMART SWOT	Kuo, C-M., Chen, L-C. & Tseng, C-Y.	International Journal of Contemporary Hospitality Management	1305-1321	Investigating an innovative service with hospitality robots	2017
48	Importance/Performance Analysis	Phadermrod, B., Crowder, R.M. & Wills, G.B.	International Journal of Information Management	194-203	Importance-Performance Analysis based SWOT analysis	2019
49	Correlative SWOT Analysis	Vlados, C.	Journal of Strategy and Management	347-363	On a Correlative and Evolutionary SWOT Analysis	2019
50	RE-SWOT	Dalpiaz, F. & Parente, M.	REFSQ 2019	55-70	RE-SWOT: From User Feedback to Requirements via Competitor Analysis	2019

## Sheet: Grading results
Setting	SWOT variant	Scores	Author(s)	Outlet	Pages	Title	Year	Hallucination	Response
Temperature 1.0	SOFT Approach	0	0	0	0	0	0		After extensive research, I couldn't find any direct link to Robert F. Stewart having a conceptual contribution to SWOT analysis. The SWOT analysis was developed in the 1960s and has been attributed to Albert Humphrey, who led a convention at the Stanford Research Institute (now known as SRI International) where the tool was reportedly first devised or applied. However, it's possible that a Rober…
Temperature 1.0	Organized Entrepreneurship	0	0	0	0	0	0		Unfortunately, there doesn't seem to be any direct references or contributions from J.D. McConnell to the concept and development of SWOT analysis. The SWOT (Strengths, Weaknesses, Opportunities, Threats) analysis was developed in the 1960s by Albert Humphrey at the Stanford Research Institute. Since then, various scholars, entrepreneurs, and business strategists have contributed to its developme…
Temperature 1.0	PIPOS framework	0	0	0	0	0	0		I'm sorry but after extensive research, I found no available information or references relating to any conceptual contribution made by Kjell-Arne Ringbakk to SWOT (Strengths, Weaknesses, Opportunities, Threats) analysis. It's possible that you may be referring to another individual or perhaps the name is misspelled. If you have any further details or another query, feel free to ask!
Temperature 1.0	"SWOT" analysis	0	0	0	0	0	0		After an extensive search, it appears that there's no direct reference or clear association between Ian A. Mottershaw and SWOT analysis in any available publications, articles or scholarly resources. Therefore, it's possible that Ian A. Mottershaw may not have made notable, documented contributions to the concept or methodology of SWOT analysis.
Temperature 1.0	Participative planning	1	1	0	0	0	0		Albert S. Humphrey, a business and management consultant, is often tagged as the person behind the development of the methodological concept of SWOT (Strengths, Weaknesses, Opportunities, and Threats) Analysis. This concept has been widely used for a strategic analysis of businesses, product development, projects, or ideas. Humphrey never published his works regarding the SWOT Analysis. Still, he…
Temperature 1.0	SWOT analysis	1	1	0	0	0	0		John Argenti is best known for his contributions to strategic management and planning. However, there seems to be little or no direct evidence or references pointing to his direct contributions specifically to SWOT analysis. One of Argenti's notable contributions is the Argenti System of Strategic Planning, which helps organizations in understanding their mission, determining strategic objectives…
Temperature 1.0	Threat/Opportunity analysis	1	1	0	0	0	0		H. Igor Ansoff is best known for his contribution to strategic management, particularly for developing the Ansoff Matrix. However, he has not directly contributed to the development of SWOT analysis, therefore it's not accurate to attribute any specific conceptual contribution to him regarding SWOT analysis. Ansoff's work, like the SWOT analysis, has been immensely valuable in the field of strate…
Temperature 1.0	WOTS-UP	2	1	0	0	1	0		George A. Steiner, an eminent management consultant and professor, is widely credited with shaping and advancing the concept of strategic planning, which underpins SWOT analysis. However, specific references directly linking Steiner to SWOT analysis seems to be lacking in scholarly articles or historical accounts. Steiner's major work, "Strategic Planning: What Every Manager Must Know", underscor…
Temperature 1.0	LCAG framework	4	1	1	0	1	1	X	1. Andrews, K.R. (1987). The concept of corporate strategy. Homewood, IL: Irwin. In this work, Andrew's articulated a way to identify an organization's potential strengths, weaknesses, opportunities, and threats, giving rise to SWOT analysis. 2. Andrews, K.R. (1971) The Concept of Corporate Strategy. Dow Jones. This work expanded on his conceptual contributions to SWOT analysis. 3. Chandler, A. D…
Temperature 1.0	TOWS matrix	3	1	0	0	1	1		Heinz Weihrich is a professor of Global Management and Behavioral Science who made significant contributions to the development of SWOT analysis. His conceptual contributions include: 1. TOWS Matrix: Weihrich conceptualized the TOWS Matrix, a strategic planning tool which stands for Threats, Opportunities, Weaknesses, and Strengths. He argued that the SWOT analysis typically stops at the listing …
Temperature 1.0	SWOPT	2	1	0	0	1	0		Several of George S. Day's works focus on strategy and market-driven organizations, making notable impacts on the field of business strategy, including SWOT analysis. His books, like "Market Driven Strategy" (1989) and "Strategy from the Outside In" (2010), both provide key insights into successful business strategies, some of which tie into SWOT analysis. However, there seems to be no explicit r…
Temperature 1.0	QSPM / management text books	3	1	1	0	1	0		1. David, F. R. (1991). Concepts of strategic management. New York: Macmillan. 2. David, F. R. (1997). Strategic Management. New Jersey: Prentice Hall. 3. David, F. R. (2005). Strategic Management: Concepts and Cases. New Jersey: Pearson/Prentice Hall. 4. David, F. R. (2009). Strategic Management: Concepts. Pearson Prentice Hall. 5. Wheelen, T. L., & Hunger, J. D., & David, F. R. (1995). Strategi…
Temperature 1.0	SFAS matrix / management text books	2	1	0	0	1	0		Currently, there is no direct reference or source that mentions Thomas L. Wheelen’s specific conceptual contributions to SWOT analysis. Thomas L. Wheelen is well-known for being the author of "Concepts in Strategic Management and Business Policy," where he discusses multiple strategic management concepts including SWOT analysis but he isn't credited for contributing to the core concept of SWOT an…
Temperature 1.0	SWA	1	1	0	0	0	0		After conducting thorough research, it appears that there are no available references or documents online that contain information on Eliza Ching-Yick Tse specifically contributing to SWOT analysis. It may be possible that she had contributions, but they might not be publicly available or recognizably associated with her. SWOT analysis is a well-documented technique in the field of business and m…
Temperature 1.0	VRIO framework	5	1	1	1	1	1		Jay Barney is a well-known scholar in the field of management and has contributed significantly to the development and understanding of strategic management theories, including SWOT analysis. Barney's primary conceptual contribution lies in "The Resource-Based View" (RBV) of the firm, which has implications for a company's SWOT analysis, specifically in regards to understanding its internal resou…
Temperature 1.0	Dynamic SWOT Analysis	0	0	0	0	0	0		I'm sorry, but I couldn't find any specific references or contributions made by T. Richard Dealty to the concept of SWOT analysis. The SWOT analysis model is widely attributed to Albert Humphrey, who developed it in the 1960s. It's very possible that an individual could apply the SWOT framework in their work or teachings without necessarily making a unique conceptual contribution to the model its…
Temperature 1.0	SPACE Matrix	0	0	0	0	0	0		I'm sorry, but after researching, I wasn't able to find any significant conceptual contributions specifically made by Laetitia Radder to SWOT analysis. It's possible that you may have confused the name with someone else in a similar field of study or expertise. Laetitia Radder is a marketing scholar known for her work on services marketing and consumer behavior, but there is no specific indicatio…
Temperature 1.0	Knowledge-based SWOT Analysis	0	0	0	0	0	0		After doing an extensive search, no direct conceptual contributions by G. Houben to SWOT analysis can be found in reliable academic literature or online resources. G. Houben is likely a misspelling, or it is possible that you may be referring to someone else. Without more information, it's difficult to provide a reliable answer. Please note that SWOT analysis was developed by Albert S Humphrey in…
Temperature 1.0	A'WOT	3	1	0	0	1	1		I am sorry, but I could not find any specific contribution of Mikko Kurttila to SWOT analysis in the available sources. Mikko Kurttila is a researcher who has extensively worked in the field of forest science and applied SWOT analysis in his research, such as in the book "Multiple Criteria Decision Analysis in Regional Forest Planning" (2000). However, he appears to have not made a significant co…
Temperature 1.0	Strategy Formulation Framework (SWOT, BSC & QFD)	1	1	0	0	0	0		After conducting an extensive search through various academic databases and resources, there appears to be no direct or indirect evidence or references linking Andrew Sai On Ko to any specific conceptual contributions to SWOT analysis. Andrew J. Ko is a well-respected professor in the Information School at the University of Washington and well-known for his research in human-computer interaction …
Temperature 1.0	Group-based SWOT analysis	1	1	0	0	0	0		I attempted to research Bernhard Gibis' contributions to SWOT analysis, but couldn't find any specifics or cited works related to your request. Bernhard Gibis is known for his contributions in the health care sector, but the direct link to SWOT analysis is unclear. Please provide more details or check the spelling and/or the field of the person you are asking about. It's possible that there may b…
Temperature 1.0	Resource-based SWOT	0	0	0	0	0	0		Upon extensive search, I couldn't find any specific references that would indicate Erhard K. Valenthin's conceptual contributions to SWOT analysis. Various resources were researched, including academic databases, business journals, and online publications. SWOT analysis is widely attributed to Albert Humphrey, who led a convention at the Stanford Research Institute in the 1960s and 1970s using da…
Temperature 1.0	SWOT & AHP analysis	0	0	0	0	0	0		Upon extensive research, there doesn't appear to be any direct link or documentation referencing Rodney A. Stewart's contributions specifically to SWOT analysis. He is well known for contributions in the field of environmental engineering, particularly in relation to water use and management, but it seems there's no available information or work directly relating him to SWOT analysis. If you migh…
Temperature 1.0	SWOT & SRA approach	1	1	0	0	0	0		Jan Emblemsvåg is an expert in strategic management and decision-making, with a specific focus on life-cycle costing, risk management, and strategic planning. Although he has extensively written on these areas, there does not appear to be specific references or publications that highlight specific contributions by Emblemsvåg to the conceptual framework of SWOT analysis. SWOT analysis is a strateg…
Temperature 1.0	S-O-S approach	5	1	1	1	1	1	X	Jyrki Kangas is a Finland-based professor who has made significant contributions to SWOT (Strengths, Weaknesses, Opportunities, and Threats) analysis in the context of forest policy and strategic environmental planning. Here are some references to his work: 1. Kangas, Jyrki & Kurttila, Mikko. (2002). "Applying SWOT analysis in forest planning: Experiences from state owned forest enterprises," For…
Temperature 1.0	STAW	0	0	0	0	0	0		I'm sorry for the confusion, but I cannot find any specific references about a person named Y.K. Ip making significant contributions to the development or popularization of SWOT (Strengths, Weaknesses, Opportunities, Threats) analysis. SWOT analysis is widely accredited to Albert Humphrey who developed this strategy analysis tool in the 1960s. However, many other scholars, writers, and business l…
Temperature 1.0	Dual-perspective SWOT	0	0	0	0	0	0		I'm sorry, but after extensive search, there doesn't appear to be any significant conceptual contribution by Milorad M. Novicevic specifically to SWOT analysis. He has done substantial works on subjects related to management and leadership, strategic change, and organizational theories. However, there's no evidence suggesting his conceptual contributions to SWOT analysis. This might be due to the…
Temperature 1.0	Participatory (SWOT) analysis	0	0	0	0	0	0		My extensive search suggests that H. Mollenhorst has no direct attribution or conceptual contribution to the development or advancement of SWOT analysis. The SWOT analysis, which stands for Strengths, Weaknesses, Opportunities, and Threats, is generally attributed to Albert Humphrey, who led a research project at Stanford University in the 1960s and 1970s that resulted in this strategic planning …
Temperature 1.0	Telescopic observations framework	0	0	0	0	0	0		I'm sorry, but after extensive research, I could not find any conceptual contribution or reference made by George Panagiotou specifically to SWOT analysis. It is possible that you may be referring to someone else or there might be some confusion with the name. George Panagiotou seems to be a fairly common name, and without more specific information it's difficult to provide the information you're…
Temperature 1.0	Quantitative SWOT analysis	5	1	1	1	1	1		Hiroshi Shinno, Yuki Takai, and Kenichi Osada are known for their development of a computer-aided method for creating a SWOT analysis matrix. They emphasized the representation of competing factors within each category of SWOT (strengths, weaknesses, opportunities, threats) and an evaluation matrix methodology for modeling the relationships between these factors. Reference: 1. Shinno, H., Yoshiok…
Temperature 1.0	ANP-SWOT	0	0	0	0	0	0		After thorough research, it appears there is no available reference or source that mentions İhsan Yüksel's conceptual contributions to SWOT analysis. İhsan Yüksel could have contributed under a different study or analysis, yet it does not appear in the readily accessible resources online. It is recommended to do more targeted research or directly contact relevant organizations or individuals for …
Temperature 1.0	Fuzzy SWOT / SWOT review paper	5	1	1	1	1	1		Sepehr Ghazinoory has contributed significantly to the field of SWOT analysis, specifically within the context of technology management. His work has focused largely on the interpretation and application of SWOT analysis in this field. For example: 1. Ghazinoory, S., Abdi, M., & Azadegan-Mehr, M. (2011). "Swot methodology: a state-of-the-art review for the past, a framework for the future". Journ…
Temperature 1.0	SOAR	0	0	0	0	0	0		I'm sorry, but after extensive research, I didn't find any direct links or references to Jen Hetzel Silbert contributing specifically to the concept of SWOT analysis. It's possible that this might be a mistake or misunderstanding. Jen Hetzel Silbert is a well-recognized leadership consultant and founder of the Learning Innovations Laboratory (LILA) at Harvard, but her work seems to be more center…
Temperature 1.0	Enhanced SWOT analysis framework	0	0	0	0	0	0		After thorough research, I couldn't find any direct references that link Noga Collins Kreiner to conceptual contributions to SWOT analysis. It's possible that you may have mistaken the name, or they might not have made significant contributions to this specific topic. The SWOT analysis framework has been contributed to by many business analysts and scholars over the years. If you have further det…
Temperature 1.0	Double house of Quality	0	0	0	0	0	0		I'm sorry, but I was unable to find any specific references or information on a "Leung Chee Koo" making contributions to SWOT analysis in business strategy literature or any related field. SWOT analysis (Strength, Weakness, Opportunity, Threat) is a common business framework used worldwide, and it has been developed and refined by numerous business professionals and scholars over the years. It's …
Temperature 1.0	The BSC-oriented SWOT matrix	0	0	0	0	0	0		I'm sorry but, after thorough research, it seems there are no specific references on the conceptual contributions of Mr. Truong‐Van Luu on the SWOT analysis. It's quite possible that such contributions have not been formally documented, or perhaps they've been mistaken or are under a different name. Alternatively, it could also be that Mr. Luu hasn't made substantial contributions to the field of…
Temperature 1.0	Fuzzy Quantitative SWOT	1	1	0	0	0	0		After searching extensively in academic databases, scholarly articles, books, and other resources, I found no specific references or details about the conceptual contributions of Lee Kuo-Liang to SWOT analysis. Lee Kuo-Liang is not listed as a prominent figure or contributor to the development or advancement of the SWOT analysis concept in these sources. It's also crucial to note that SWOT analys…
Temperature 1.0	Focused SWOT	1	1	0	0	0	0		Upon conducting extensive research, there does not appear to be any concrete references associating Alex Coman with significant contributions to the concept of SWOT (Strengths, Weaknesses, Opportunities, Threats) analysis. It seems there might be some confusion or miscommunication in this matter. Please note that information on the internet might be limited, and potential contributions or works b…
Temperature 1.0	Augmented SWOT analysis	1	1	0	0	0	0		Despite extensive search, there is no specific information or resources available indicating that Weisheng Lu has made any distinct conceptual contribution to SWOT analysis. Weisheng Lu is predominantly recognized for his work in the field of construction and real estate, specifically interested in Big data and analytics, Smart construction and real estate, and Construction and Demolition waste m…
Temperature 1.0	AHP-SWOT	1	1	0	0	0	0		Eduardas Kazimieras Zavadskas, a distinguished professor in the field of decision-making sciences, has made several contributions to the SWOT analysis, particularly in integrating it with multiple-criteria decision-making (MCDM) methods. Here are a few of his works where he discusses these concepts: 1. Zavadskas, E. K., Bausys, R., Lazauskas, M., & Şaparauskas, J. (2015, March). Sustainable analy…
Temperature 1.0	SWOT 3 x 3 matrix	0	0	0	0	0	0		I'm sorry for the inconvenience, but after a comprehensive search in academic databases, professional publications, and other resources, I wasn't able to find any references to a person named M. Konstanciak making conceptual contributions to SWOT analysis. SWOT analysis is a well-established strategic planning technique typically credited to Albert Humphrey. There's a possibility that the name mi…
Temperature 1.0	Meta-SWOT	0	0	0	0	0	0		After extensive research, there seems to be no specific mention or references of Ravi Agarwal making conceptual contributions to SWOT analysis. It is possible you may have confused him with another professional, as Ravi Agarwal is quite a common name in India. Ravi Agarwal is known in different fields such as environmental activism or mathematics, but there are no records suggesting that he made …
Temperature 1.0	SWONT	1	1	0	0	0	0		I've conducted an extensive search for information on Gaston de los Reyes and his contributions to the topic of SWOT analysis. Unfortunately, there seems to be no available information or documents that indicate Gaston de los Reyes has made significant contributions to the conceptualization or development of SWOT analysis. Gaston de los Reyes is a Professor of Strategic Management and Public Poli…
Temperature 1.0	Climate SWOT	0	0	0	0	0	0		I'm sorry, but I couldn't find any specific references to Hanna-Leena Pesonen contributing to the concept of SWOT analysis. It's possible that there might be some miscommunication or mistake in the information provided. SWOT analysis has been a widely discussed topic in strategic management and its key principles have been in place for many years, contributed by many scholars. However, the specif…
Temperature 1.0	SVOR	1	1	0	0	0	0		Upon reviewing several resources and databases, there doesn't appear to be any direct evidence or references linking Olivier Mesly to significant contributions to SWOT analysis. Olivier Mesly is a known researcher, notable for contributions to the field of marketing, however, it seems his work does not specifically focus on SWOT analysis. If you have specific information about Mesly's contributio…
Temperature 1.0	SWUF analysis	0	0	0	0	0	0		After extensive research, there are no specific references available that attribute a conceptual contribution to J. Siciliano in relation to SWOT analysis. This could potentially be due to a misinterpretation of the individual’s name, a lack of publicly available information, or the individual not having made notable contributions to this particular field. SWOT analysis, originally created in the…
Temperature 1.0	SMART SWOT	0	0	0	0	0	0		I'm sorry for any confusion, but after conducting an extensive search across scholarly articles, books, and databases, I found no specific references that would clarify a conceptual contribution by Chun-Min Kuo to SWOT Analysis. SWOT Analysis is a strategic planning technique widely attributed to Albert Humphrey, arising from his work at the Stanford Research Institute in the 1960s and 1970s.
Temperature 1.0	Importance/Performance Analysis	0	0	0	0	0	0		I'm sorry, but I couldn't find any resources or references that cite Boonyarat Phadermrod's conceptual contributions to SWOT analysis. It seems this individual may not have been a key contributor to this area. It's also possible that this person's work might have been carried out in a language or region not readily available in global academic databases. For reference, SWOT analysis is a strategi…
Temperature 1.0	Correlative SWOT Analysis	2	1	0	0	1	0	X	1. "The portrayal of the business ecosystem through the STRATynamic model in Switzerland and Southeastern Europe: the case of Greek firms in the canton of Geneva" - This study by Charis Vlados emphasizes on the need for SWOT analysis to incorporate a dynamic, evolving nature to better equip businesses to adapt to their changing environments. Vlados suggests that the creation of a STRATegic dynami…
Temperature 1.0	RE-SWOT	0	0	0	0	0	0		After conducting an in-depth search, there appears to be limited or no publicly available information suggesting that Fabiano Dalpiaz, known for his contributions to the field of computer science and requirements engineering, has made any significant conceptual contributions to SWOT analysis, which is a strategic planning framework. Please, consult academic databases or contact Dalpiaz directly f…
Temperature 0.2	SOFT Approach	0	0	0	0	0	0		I'm sorry, but I couldn't find any specific references or contributions made by Robert F. Stewart to SWOT analysis. It's possible that you may have confused the name or there might be a misunderstanding. SWOT analysis was developed by Albert Humphrey in the 1960s and 1970s. Please provide more specific details if available.
Temperature 0.2	Organized Entrepreneurship	0	0	0	0	0	0		I'm sorry, but I couldn't find any specific references or contributions made by J. Douglas McConnell to the concept of SWOT analysis. It seems there might be some confusion as SWOT analysis is generally attributed to Albert Humphrey, who developed the tool in the 1960s and 1970s. J. Douglas McConnell is a notable figure in other fields, but there doesn't appear to be a connection between him and …
Temperature 0.2	PIPOS framework	0	0	0	0	0	0		I'm sorry, but after extensive research, I couldn't find any specific references or contributions made by Kjell-Arne Ringbakk to the concept of SWOT analysis. It's possible that you may have confused the name or there might be a spelling error. Please provide the correct details.
Temperature 0.2	"SWOT" analysis	0	0	0	0	0	0		I'm sorry, but after extensive research, I couldn't find any specific references or contributions made by Ian A. Mottershaw to SWOT analysis. It's possible that you may have misspelled the name or confused it with another person. SWOT analysis is a well-known strategic planning tool, and many business professionals and academics have contributed to its development and use. However, the specific c…
Temperature 0.2	Participative planning	2	1	0	0	1	0		Albert S. Humphrey is widely credited as the creator of the SWOT analysis during his work at Stanford Research Institute in the 1960s and 1970s. His conceptual contributions to this strategic planning tool are significant and have been referenced in numerous publications and resources. Here are a few references: 1. Humphrey, A. (2005). SWOT Analysis for Management Consulting. SRI Alumni Associati…
Temperature 0.2	SWOT analysis	1	1	0	0	0	0		John Argenti is a well-known figure in the field of strategic management, but there is no specific evidence or reference to suggest that he made direct contributions to the development or conceptualization of SWOT analysis. SWOT analysis, which stands for Strengths, Weaknesses, Opportunities, and Threats, is a strategic planning tool that was developed in the 1960s by Albert Humphrey at the Stanf…
Temperature 0.2	Threat/Opportunity analysis	0	0	0	0	0	0		H. Igor Ansoff is widely recognized for his contributions to strategic management and planning, particularly through the development of the Ansoff Matrix. However, there is no direct reference or evidence to suggest that Ansoff made a significant contribution to the development of SWOT (Strengths, Weaknesses, Opportunities, Threats) analysis. SWOT analysis is often attributed to Albert Humphrey, …
Temperature 0.2	WOTS-UP	3	1	1	0	1	0		George A. Steiner is a renowned professor of management and one of the world's leading authorities on strategic planning. While he did not directly invent the SWOT analysis, his work in strategic planning and management education has significantly contributed to the development and popularization of this tool. 1. Steiner, G. A. (1979). Strategic planning. New York: Free Press. In this book, Stein…
Temperature 0.2	LCAG framework	4	1	1	0	1	1	X	1. Andrews, K. R. (1971). The concept of corporate strategy. Homewood, IL: Irwin. In this book, Andrews introduced the concept of SWOT analysis as a tool for strategic planning in business. He emphasized the importance of analyzing a company's strengths, weaknesses, opportunities, and threats in order to develop effective strategies. 2. Andrews, K. R. (1980). The concept of corporate strategy. Ne…
Temperature 0.2	TOWS matrix	5	1	1	1	1	1		1. Weihrich, H. (1982). The TOWS matrix—A tool for situational analysis. Long Range Planning, 15(2), 54-66. 2. Weihrich, H. (1999). Analyzing the competitive advantages and disadvantages of Germany with the TOWS Matrix—an alternative to Porter's Model. European Business Review, 99(1), 9-22. 3. Weihrich, H. (2005). The SWOT Matrix and the Derivatives for Strategic Planning. International Journal o…
Temperature 0.2	SWOPT	2	1	0	0	1	0		1. Day, G. S. (1986). Analysis for strategic market decisions. West Publishing Company. 2. Day, G. S. (1994). The capabilities of market-driven organizations. Journal of marketing, 58(4), 37-52. 3. Day, G. S., & Reibstein, D. J. (1997). Wharton on dynamic competitive strategy. John Wiley & Sons. 4. Day, G. S. (2007). Is it real? Can we win? Is it worth doing? Managing risk and reward in an innova…
Temperature 0.2	QSPM / management text books	3	1	1	0	1	0		Fred R. David, a renowned author and professor, has contributed significantly to the field of strategic management, particularly in the area of SWOT analysis. His work has been widely cited and used in both academic and business settings. 1. David, F. R. (2009). Strategic Management: Concepts and Cases. Pearson/Prentice Hall. In this book, David provides a comprehensive overview of strategic mana…
Temperature 0.2	SFAS matrix / management text books	3	1	0	0	1	1		Thomas L. Wheelen is a renowned author and professor known for his contributions to strategic management and business policy. He has written extensively on SWOT analysis in his books and research papers. 1. Wheelen, T. L., & Hunger, J. D. (2011). Concepts in strategic management and business policy. Pearson Education India. In this book, Wheelen discusses the importance of SWOT analysis in strate…
Temperature 0.2	SWA	1	1	0	0	0	0		Eliza Ching-Yick Tse is a renowned professor and researcher in the field of tourism and hospitality management. While she has made significant contributions to the field, there doesn't seem to be any specific references or records of her making conceptual contributions to SWOT analysis. Her work primarily focuses on tourism economics, hospitality management, and tourism marketing. It's important …
Temperature 0.2	VRIO framework	5	1	1	1	1	1		Jay Barney is a renowned professor of management and has made significant contributions to the field of strategic management. While he did not directly contribute to the development of SWOT analysis, his work on resource-based theory has significant implications for how SWOT analysis is conducted. 1. Barney, J. (1991). Firm resources and sustained competitive advantage. Journal of Management, 17(…
Temperature 0.2	Dynamic SWOT Analysis	0	0	0	0	0	0		I'm sorry, but I couldn't find any specific references or contributions made by T. Richard Dealty to SWOT analysis. It's possible that you may have misspelled the name or there might be a confusion with the person in question. SWOT analysis is a strategic planning technique credited to Albert Humphrey, who led a convention at the Stanford Research Institute (now SRI International) in the 1960s an…
Temperature 0.2	SPACE Matrix	1	1	0	0	0	0		I'm sorry, but after extensive research, I couldn't find any specific references or contributions made by Laetitia Radder to the concept of SWOT analysis. It's possible that you may have confused the person or the concept. Laetitia Radder is a professor in the Department of Marketing Management at Nelson Mandela University and her research interests include consumer behavior, marketing research, …
Temperature 0.2	Knowledge-based SWOT Analysis	1	1	0	0	0	0		I'm sorry, but I couldn't find any specific references or contributions made by Geert-Jan Houben to SWOT analysis. Geert-Jan Houben is a well-known figure in the field of web information systems, user modeling, and personalization, but there doesn't seem to be any direct link between his work and SWOT analysis. SWOT analysis is a strategic planning tool used in business to identify strengths, wea…
Temperature 0.2	A'WOT	1	1	0	0	0	0		I'm sorry, but I couldn't find any specific references or contributions made by Mikko Kurttila to SWOT analysis. Mikko Kurttila is known for his work in the field of forestry and environmental sciences, particularly in multi-criteria decision making. He has written extensively on these topics, but there doesn't seem to be any direct link to SWOT analysis. It's possible that you may have confused …
Temperature 0.2	Strategy Formulation Framework (SWOT, BSC & QFD)	0	0	0	0	0	0		I'm sorry, but there seems to be a misunderstanding. Andrew Sai On Ko is not associated with the development or conceptual contributions to SWOT analysis. SWOT analysis is a strategic planning technique used to help a person or organization identify strengths, weaknesses, opportunities, and threats related to business competition or project planning. It was developed in the 1960s by Albert Humphr…
Temperature 0.2	Group-based SWOT analysis	1	1	0	0	0	0		I'm sorry, but I couldn't find any specific references or contributions made by Bernhard Gibis to the concept of SWOT analysis. It's possible that you may have confused the person or the concept. Bernhard Gibis is a known figure in the field of health policy and health services research, but there's no available information or documentation about his work related to SWOT analysis.
Temperature 0.2	Resource-based SWOT	0	0	0	0	0	0		I'm sorry, but after extensive research, I couldn't find any specific references or contributions made by Erhard K. Valentin to the concept of SWOT analysis. It's possible that you may have mistaken the person or the concept. SWOT analysis was developed in the 1960s by Albert Humphrey at the Stanford Research Institute, and there's no clear link between this tool and Erhard K. Valentin. Please pr…
Temperature 0.2	SWOT & AHP analysis	0	0	0	0	0	0	X	I'm sorry, but there seems to be no available information or references regarding any conceptual contributions made by Rodney A. Stewart to SWOT analysis. It's possible that you may have confused the person or the concept. Rodney A. Stewart is known for his work in the field of environmental engineering and sustainability, not business strategy or SWOT analysis.
Temperature 0.2	SWOT & SRA approach	2	1	0	0	1	0		Jan Emblemsvåg is a Norwegian industrial economist who has contributed to the development of SWOT analysis through his work on strategic management and decision-making processes. He has proposed a more systematic and structured approach to SWOT analysis, emphasizing the need for a more rigorous, quantitative, and evidence-based method. 1. Emblemsvåg, J. (2010). Lean project planning in shipbuildi…
Temperature 0.2	S-O-S approach	5	1	1	1	1	1		Jyrki Kangas is a renowned scholar in the field of forestry and environmental sciences. His work often involves strategic planning and decision-making processes, including the use of SWOT (Strengths, Weaknesses, Opportunities, and Threats) analysis. However, there seems to be no specific reference or publication that highlights his conceptual contributions to SWOT analysis. Here are some of his w…
Temperature 0.2	STAW	0	0	0	0	0	0		I'm sorry, but after extensive research, I couldn't find any specific references or contributions made by Y.K. Ip to SWOT analysis. It's possible that you may have confused the name or there might be a spelling error. Please provide the correct information.
Temperature 0.2	Dual-perspective SWOT	1	1	0	0	0	0		I'm sorry, but after extensive research, I couldn't find any specific references or contributions made by Milorad M. Novicevic to SWOT analysis. It's possible that you may have confused the person or the concept. Milorad M. Novicevic is a professor of Management and has written on topics such as leadership, strategic management, and organizational behavior, but there doesn't seem to be any direct…
Temperature 0.2	Participatory (SWOT) analysis	0	0	0	0	0	0		I'm sorry, but there seems to be a misunderstanding. Herman Mollenhorst does not appear to have any notable contributions to the development or application of SWOT analysis. SWOT analysis was developed in the 1960s by Albert Humphrey at the Stanford Research Institute, and there is no widely recognized connection between this tool and Herman Mollenhorst in the literature. It's possible that there…
Temperature 0.2	Telescopic observations framework	0	0	0	0	0	0		I'm sorry, but after extensive research, I couldn't find any specific references or resources that directly link George Panagiotou to significant conceptual contributions to SWOT analysis. It's possible that there may be some confusion or miscommunication about the individual in question or their contributions. SWOT analysis is a well-known strategic planning tool often credited to Albert Humphre…
Temperature 0.2	Quantitative SWOT analysis	5	1	1	1	1	1		Hiroshi Shinno is a well-known academic who has made significant contributions to the field of strategic management, particularly in the area of SWOT analysis. His work has helped to refine and expand the understanding of this important strategic tool. 1. Shinno, H., Yoshioka, H., Marpaung, S., & Hachiga, S. (2006). Quantitative SWOT analysis on global competitiveness of machine tool industry. Jo…
Temperature 0.2	ANP-SWOT	1	0	0	0	1	0		I'm sorry, but I couldn't find any specific references or contributions made by İhsan Yüksel to SWOT analysis. It's possible that you may have confused the name or there might be a spelling error. SWOT analysis is a well-known strategic planning tool, and many scholars have contributed to its development and application. However, without the correct information, it's challenging to provide the ex…
Temperature 0.2	Fuzzy SWOT / SWOT review paper	5	1	1	1	1	1		Sepehr Ghazinoory is a well-known figure in the field of strategic management and has made significant contributions to the understanding and application of SWOT analysis. Here are some references to his work: 1. Ghazinoory, S., Abdi, M., & Azadegan-Mehr, M. (2011). SWOT Methodology: A State-of-the-Art Review for the Past, a Framework for the Future. Journal of Business Economics and Management, …
Temperature 0.2	SOAR	1	1	0	0	0	0		I'm sorry, but after extensive research, I couldn't find any specific references or contributions made by Jen Hetzel Silbert to SWOT analysis. Jen Hetzel Silbert is a well-known leadership coach and founder of Learning Innovations Laboratory (LILA) at Harvard University, but her work seems to be more focused on leadership development, learning, and organizational change rather than SWOT analysis.…
Temperature 0.2	Enhanced SWOT analysis framework	1	1	0	0	0	0		I'm sorry, but I couldn't find any specific references or contributions made by Noga Collins Kreiner to SWOT analysis. It's possible that you may have confused the name or the field of study. Noga Collins-Kreiner is a well-known researcher in the field of tourism and geography, but there doesn't seem to be any direct link between her work and SWOT analysis. Please provide more details or check th…
Temperature 0.2	Double house of Quality	0	0	0	0	0	0		I'm sorry, but I couldn't find any specific references or contributions made by Leung Chee Koo to SWOT analysis. It's possible that you may have misspelled the name or there might be a confusion with the person's identity. SWOT analysis is a well-known strategic planning tool, and many scholars have contributed to its development and application. However, without accurate and specific information…
Temperature 0.2	The BSC-oriented SWOT matrix	0	0	0	0	0	0		I'm sorry, but after extensive research, I couldn't find any specific references or resources that mention Truong‐Van Luu's contributions to SWOT analysis. It's possible that you may have misspelled the name or there might be a misunderstanding about the person's contributions. SWOT analysis is a well-known strategic planning tool, and many scholars have contributed to its development and applica…
Temperature 0.2	Fuzzy Quantitative SWOT	0	0	0	0	0	0		I'm sorry, but I couldn't find any specific references or resources that directly link Lee Kuo-liang to significant conceptual contributions to SWOT analysis. It's possible that there might be some confusion or miscommunication about the individual in question. SWOT analysis is a widely used strategic planning tool, and its development is generally attributed to Albert Humphrey, who led a convent…
Temperature 0.2	Focused SWOT	0	0	0	0	0	0		I'm sorry, but I couldn't find any specific references or contributions made by Alex Coman to SWOT analysis. It's possible that you may have mistaken the name, or the person in question is not widely recognized in this field.
Temperature 0.2	Augmented SWOT analysis	0	0	0	0	0	0		I'm sorry, but after conducting extensive research, I was unable to find any specific references or contributions made by Weisheng Lu to the concept of SWOT analysis. Weisheng Lu is a well-known figure in the field of construction management and digital innovation in construction, but there doesn't appear to be any direct link between his work and SWOT analysis. It's possible that you may have co…
Temperature 0.2	AHP-SWOT	4	1	1	1	0	1		E.K. Zavadskas is a renowned researcher in the field of decision-making and management science. He has contributed significantly to the development and application of SWOT analysis, particularly in integrating it with other decision-making methods. Here are some references to his work: 1. Zavadskas, E. K., Antucheviciene, J., Turskis, Z., & Adeli, H. (2016). Hybrid multiple-criteria decision-maki…
Temperature 0.2	SWOT 3 x 3 matrix	0	0	0	0	0	0		I'm sorry, but I couldn't find any specific references or contributions made by an individual named M. Konstanciak to the concept of SWOT analysis. It's possible that there might be a misunderstanding or misspelling of the name. SWOT analysis is a well-known strategic planning tool, and many scholars have contributed to its development and application, but without the correct details, it's challe…
Temperature 0.2	Meta-SWOT	1	1	0	0	0	0		I'm sorry, but I couldn't find any specific references or contributions made by Ravi Agarwal to SWOT analysis. It's possible that you may have confused the person or the field of study. Ravi Agarwal is a well-known figure in the field of mathematics, but SWOT analysis is a strategic planning tool used in business to evaluate Strengths, Weaknesses, Opportunities, and Threats. Please provide more s…
Temperature 0.2	SWONT	1	1	0	0	0	0		I'm sorry, but after extensive research, I couldn't find any specific references or contributions made by Gaston de los Reyes to SWOT analysis. Gaston de los Reyes is an Associate Professor of Strategic Management at George Washington University and his research interests include environmental sustainability, business ethics, and corporate strategy. However, there doesn't seem to be any direct li…
Temperature 0.2	Climate SWOT	0	0	0	0	0	0		I'm sorry, but after extensive research, I couldn't find any specific references to Hanna-Leena Pesonen contributing to the concept of SWOT analysis. It's possible that you may have confused the person or the concept. Please provide the correct details.
Temperature 0.2	SVOR	0	0	0	0	0	0		I'm sorry, but after extensive research, I couldn't find any specific references or sources that directly link Olivier Mesly to conceptual contributions to SWOT analysis. Olivier Mesly is a known researcher in the field of marketing and has made significant contributions to the understanding of predatory marketing. However, his work doesn't seem to directly relate to SWOT analysis. Please note th…
Temperature 0.2	SWUF analysis	0	0	0	0	0	0		I'm sorry, but I couldn't find any specific references or contributions made by a person named J. Siciliano in relation to SWOT analysis. It's possible that there might be some confusion regarding the name or the field of contribution. SWOT analysis is a widely used strategic planning tool, and many scholars and business professionals have contributed to its development and application. However, …
Temperature 0.2	SMART SWOT	0	0	0	0	0	0		I'm sorry, but after extensive research, I couldn't find any specific references or resources that directly link Chun-Min Kuo to contributions in SWOT analysis. It's possible that you may have confused the name or the field of study. Chun-Min Kuo is a name associated with several fields including engineering and technology, but there doesn't seem to be a direct connection to SWOT analysis. Please…
Temperature 0.2	Importance/Performance Analysis	0	0	0	0	0	0		I'm sorry, but there doesn't seem to be any specific information available on Boonyarat Phadermrod's conceptual contributions to SWOT analysis. It's possible that you may have misspelled the name or are referring to a less-known figure in the field. If you have any more information that could help me in the search, please provide it.
Temperature 0.2	Correlative SWOT Analysis	2	1	0	0	1	0	X	Charis Vlados is a professor and researcher who has made significant contributions to the field of SWOT analysis. His work has focused on the development and application of the SWOT analysis in the context of socio-economic systems and business strategy. 1. Vlados, C. (2019). The Dialectical Evolution of Strategic Management: Towards a Socio-ecological Intellectual Approach. International Busines…
Temperature 0.2	RE-SWOT	0	0	0	0	0	0		I'm sorry, but after conducting extensive research, I couldn't find any specific references or contributions made by Fabiano Dalpiaz to SWOT analysis. Fabiano Dalpiaz is a well-known researcher in the field of requirements engineering and goal-oriented modeling, but there doesn't seem to be any direct link between his work and SWOT analysis.
Top_P 0.5	SOFT Approach	0	0	0	0	0	0		I'm sorry, but I couldn't find any specific references or contributions made by Robert F. Stewart to SWOT analysis. The SWOT analysis was developed in the 1960s by Albert Humphrey, not Robert F. Stewart. It might be possible that you've confused the person or the concept. Please provide more specific or correct information.
Top_P 0.5	Organized Entrepreneurship	0	0	0	0	0	0		I'm sorry, but I couldn't find any specific references or contributions made by J.D. McConnell to SWOT analysis. The SWOT analysis concept is generally attributed to Albert Humphrey, who led a convention at the Stanford Research Institute (now SRI International) in the 1960s and 1970s using data from Fortune 500 companies. If you have more specific information about J.D. McConnell's work or the c…
Top_P 0.5	PIPOS framework	0	0	0	0	0	0		I'm sorry, but after extensive research, I could not find any specific references or resources that mention Kjell-Arne Ringbakk's contributions to SWOT analysis. It's possible that you may have misspelled the name or there might be some confusion about the individual's contributions. If you have any additional information that could help me in the search, please provide it.
Top_P 0.5	"SWOT" analysis	0	0	0	0	0	0		I'm sorry, but after extensive research, I could not find any specific references or resources that link Ian A. Mottershaw to significant contributions in the field of SWOT analysis. It's possible that you may have mistaken the name, or that his contributions are not widely recognized or available in public databases.
Top_P 0.5	Participative planning	1	1	0	0	0	0	X	Albert S. Humphrey is often credited with developing the SWOT analysis in the 1960s and 1970s while he was a consultant at the Stanford Research Institute. However, it is important to note that Humphrey himself did not use the term "SWOT". Instead, he used the terms "SOFT" (Satisfactory, Opportunity, Fault, Threat). 1. "Albert Humphrey (1926-2005)." In Key Thinkers in Critical Management Studies,…
Top_P 0.5	SWOT analysis	2	1	0	0	1	0		John Argenti is a renowned management theorist who has made significant contributions to the field of strategic planning and corporate health. However, there seems to be no direct reference or evidence that links John Argenti to the development or modification of the SWOT analysis. SWOT analysis, which stands for Strengths, Weaknesses, Opportunities, and Threats, is a strategic planning tool that…
Top_P 0.5	Threat/Opportunity analysis	1	1	0	0	0	0		H. Igor Ansoff is widely recognized for his contributions to strategic management and planning, particularly for his development of the Ansoff Matrix. However, his direct contributions to the development of SWOT (Strengths, Weaknesses, Opportunities, Threats) analysis are not well-documented or referenced in the literature. SWOT analysis is often attributed to Albert Humphrey, who led a research …
Top_P 0.5	WOTS-UP	3	1	1	0	1	0		George A. Steiner is a renowned scholar in the field of strategic planning and management. He has contributed significantly to the development and application of SWOT analysis, a strategic planning tool used to evaluate the Strengths, Weaknesses, Opportunities, and Threats involved in a project or business venture. 1. Steiner, G. A. (1979). Strategic planning: What every manager must know. New Yo…
Top_P 0.5	LCAG framework	4	1	1	0	1	1		1. Andrews, K. R. (1971). The Concept of Corporate Strategy. Homewood, IL: Irwin. 2. Andrews, K. R. (1980). The Concept of Corporate Strategy. New York: McGraw-Hill. 3. Andrews, K. R. (1987). The Concept of Corporate Strategy. New York: McGraw-Hill. 4. Andrews, K. R. (1997). The Concept of Corporate Strategy. New York: McGraw-Hill. 5. Pickton, D. W., & Wright, S. (1998). What's SWOT in strategic …
Top_P 0.5	TOWS matrix	5	1	1	1	1	1		1. Weihrich, H. (1982). The TOWS matrix—A tool for situational analysis. Long Range Planning, 15(2), 54-66. 2. Weihrich, H. (1991). The TOWS matrix: A tool for situational analysis. In Strategies in Global Competition (pp. 520-532). Routledge. 3. Weihrich, H. (1982). The SWOT matrix: A tool for situational analysis. Long Range Planning, 15(2), 54-66. 4. Weihrich, H. (2005). Swot Analysis: A Manag…
Top_P 0.5	SWOPT	5	1	1	1	1	1		George S. Day is a well-respected scholar in the field of marketing and strategic planning. While he did not directly contribute to the development of SWOT analysis (which was developed in the 1960s at Stanford Research Institute), his work has significantly influenced how this tool is used in strategic planning. 1. Day, G. S. (1984). Strategic Market Planning: The Pursuit of Competitive Advantag…
Top_P 0.5	QSPM / management text books	3	1	1	0	1	0		Fred R. David has made significant contributions to the field of strategic management, including the development and application of SWOT analysis. His work has been widely recognized and used in both academic and business settings. 1. David, F. R. (2011). Strategic Management: Concepts and Cases. Pearson/Prentice Hall. In this book, David provides a comprehensive overview of strategic management …
Top_P 0.5	SFAS matrix / management text books	4	1	1	0	1	1		Thomas L. Wheelen is a well-known author and researcher in the field of strategic management. His work has contributed significantly to the development and understanding of SWOT analysis, a tool used for strategic planning and decision-making. 1. Wheelen, T. L., & Hunger, J. D. (2011). Concepts in strategic management and business policy. Pearson. In this book, Wheelen and his co-author provide a…
Top_P 0.5	SWA	1	1	0	0	0	0		I'm sorry, but I couldn't find any specific references or contributions made by Eliza Ching-Yick Tse to SWOT analysis. It's possible that you may have confused the person or the field of contribution. Eliza Ching-Yick Tse is a notable figure in the field of Hospitality Management and Tourism, with several publications on these subjects. However, there's no available record of her making a signifi…
Top_P 0.5	VRIO framework	5	1	1	1	1	1		Jay Barney is a renowned professor of management and his main contribution to SWOT analysis lies in his work on resource-based theory. While he did not directly contribute to the development of SWOT analysis, his theories have been used to enhance and deepen the understanding of the internal analysis part of SWOT (Strengths and Weaknesses). 1. Barney, J. (1991). Firm Resources and Sustained Compe…
Top_P 0.5	Dynamic SWOT Analysis	0	0	0	0	0	0		I'm sorry, but I couldn't find any information or references related to T. Richard Dealty's contributions to SWOT analysis. It's possible that you may have misspelled the name or confused it with someone else. SWOT analysis is generally attributed to Albert Humphrey, who developed this strategic planning tool during the 1960s and 1970s.
Top_P 0.5	SPACE Matrix	0	0	0	0	0	0		I'm sorry, but I could not find any specific references or contributions made by Laetitia Radder to SWOT analysis. It's possible that you may have confused the name or misspelled it. Laetitia Radder is a professor in the Department of Marketing Management at Nelson Mandela University, and her research interests include consumer behavior, marketing research, and services marketing. However, there'…
Top_P 0.5	Knowledge-based SWOT Analysis	0	0	0	0	0	0		I'm sorry, but I was unable to find any specific references or contributions made by a person named G. Houben to the concept of SWOT analysis. SWOT analysis is a well-known strategic planning tool used in business to evaluate strengths, weaknesses, opportunities, and threats, and it has been developed and refined by many contributors over the years. If you have more specific information about G. …
Top_P 0.5	A'WOT	1	1	0	0	0	0		After extensive research, it appears that Mikko Kurttila, a Finnish researcher, has made significant contributions to the field of forestry research and management, particularly in the use of multi-criteria decision making methods. However, there is no specific reference or evidence found in the available literature that directly links Mikko Kurttila to conceptual contributions to SWOT (Strengths…
Top_P 0.5	Strategy Formulation Framework (SWOT, BSC & QFD)	1	1	0	0	0	0		I'm sorry, but I couldn't find any information or references related to Andrew Sai On Ko making conceptual contributions to SWOT analysis. It's possible that you may have confused the person or the concept. Andrew Ko is known for his work in the field of computing and human-computer interaction, not SWOT analysis, which is a strategic planning tool used in business.
Top_P 0.5	Group-based SWOT analysis	0	0	0	0	0	0		I'm sorry, but I couldn't find any specific references or resources that mention Bernhard Gibis's conceptual contributions to SWOT analysis. It's possible that you may have mistaken the name or that his work is not widely recognized or easily accessible online. Please provide more details or check the information again.
Top_P 0.5	Resource-based SWOT	0	0	0	0	0	0		I'm sorry, but after extensive research, I couldn't find any specific references or information linking Erhard K. Valentin to significant conceptual contributions to SWOT analysis. It's possible that you may have confused the name or the concept. SWOT analysis is a widely used strategic planning tool, and many business strategists and consultants have contributed to its development and use. Howev…
Top_P 0.5	SWOT & AHP analysis	0	0	0	0	0	0		I'm sorry, but I couldn't find any specific references or contributions made by Rodney A. Stewart to the concept of SWOT analysis. It's possible that you may have confused the name or the field of contribution. SWOT analysis is a strategic planning technique credited to Albert Humphrey, who led a convention at the Stanford Research Institute (now SRI International) in the 1960s and 1970s using da…
Top_P 0.5	SWOT & SRA approach	2	1	0	0	1	0	X	Jan Emblemsvåg is a renowned business strategist who has made significant contributions to the field of SWOT analysis. His work primarily focuses on incorporating life-cycle costing and activity-based costing into SWOT analysis. 1. Emblemsvåg, J. (2010). "Life-cycle costing and its role in SWOT analysis." In Emblemsvåg, J. (Ed.), Life-Cycle Costing: Using Activity-Based Costing and Monte Carlo Me…
Top_P 0.5	S-O-S approach	1	1	0	0	0	0		After extensive research, there seems to be no specific references or resources available that directly link Jyrki Kangas to significant conceptual contributions to SWOT analysis. Jyrki Kangas is a well-known figure in the field of forestry science and management, and while he has used SWOT analysis in his work, it doesn't appear that he has made notable conceptual contributions to the developmen…
Top_P 0.5	STAW	0	0	0	0	0	0		I'm sorry, but I couldn't find any specific references or contributions made by Y.K. Ip to SWOT analysis. It might be possible that you've mistaken the name or there's a spelling error. The SWOT analysis concept is generally attributed to Albert Humphrey, who led a convention at the Stanford Research Institute in the 1960s and 1970s using data from Fortune 500 companies.
Top_P 0.5	Dual-perspective SWOT	0	0	0	0	0	0		I'm sorry, but after extensive research, I was unable to find any specific references or resources that highlight Milorad M. Novicevic's contributions to SWOT analysis. It's possible that you may have confused him with someone else or that his work on this subject isn't widely recognized or easily accessible online. Novicevic is a recognized scholar in the field of management, with a focus on lea…
Top_P 0.5	Participatory (SWOT) analysis	0	0	0	0	0	0		I'm sorry, but after extensive research, I couldn't find any specific references or contributions made by H. Mollenhorst to the concept of SWOT analysis. It's possible that there might be a confusion with the name or the field of study. SWOT analysis is a strategic planning technique credited to Albert Humphrey, who led a convention at the Stanford Research Institute in the 1960s and 1970s using …
Top_P 0.5	Telescopic observations framework	0	0	0	0	0	0		I'm sorry, but I couldn't find any specific references or contributions made by George Panagiotou to SWOT analysis. It's possible that you may have confused the name or there might be a misunderstanding. SWOT analysis is a well-known strategic planning tool, but there doesn't seem to be a direct link to George Panagiotou in this context. Please provide more specific details if available.
Top_P 0.5	Quantitative SWOT analysis	5	1	1	1	1	1		Hiroshi Shinno, along with other researchers, has made significant contributions to the field of SWOT analysis. His work has focused on enhancing the traditional SWOT analysis method by incorporating quantitative elements. 1. Shinno, H., Yoshioka, H., Marpaung, S., & Hachiga, S. (2006). Quantitative SWOT analysis on global competitiveness of machine tool industry. Journal of Engineering Design, 1…
Top_P 0.5	ANP-SWOT	0	0	0	0	0	0		I'm sorry, but after extensive research, I couldn't find any specific references or contributions made by İhsan Yüksel to SWOT analysis. It's possible that you may have confused the name or misspelled it. SWOT analysis is a widely used strategic planning tool, and many scholars have contributed to its development and use. However, without the correct information, it's challenging to provide the a…
Top_P 0.5	Fuzzy SWOT / SWOT review paper	5	1	1	1	1	1		Sepehr Ghazinoory is a well-known figure in the field of strategic management and has made significant contributions to the understanding and application of SWOT analysis. Here are some references to his work: 1. Ghazinoory, S., Abdi, M., & Azadegan-Mehr, M. (2011). Swot methodology: a state-of-the-art review for the past, a framework for the future. Journal of Business Economics and Management, …
Top_P 0.5	SOAR	0	0	0	0	0	0		I'm sorry, but after conducting a thorough search, I couldn't find any specific references or sources that directly link Jen Hetzel Silbert to contributions in SWOT analysis. Jen Hetzel Silbert is a known leadership coach and founder of the Strengths Doctors, but her work seems to be more focused on strengths-based development and leadership rather than SWOT analysis. Please note that information…
Top_P 0.5	Enhanced SWOT analysis framework	0	0	0	0	0	0		I'm sorry, but I couldn't find any specific references or contributions made by Noga Collins Kreiner to SWOT analysis. It's possible that you may have confused the name or there might be a misunderstanding. SWOT analysis is a well-established business tool and many people have contributed to its development and usage, but specific contributions by Noga Collins Kreiner are not documented or recogn…
Top_P 0.5	Double house of Quality	0	0	0	0	0	0		I'm sorry, but I couldn't find any specific references or information related to Leung Chee Koo's contributions to SWOT analysis. It's possible that you may have misspelled the name or are referring to a less-known figure. Please provide more details or check the information.
Top_P 0.5	The BSC-oriented SWOT matrix	0	0	0	0	0	0		I'm sorry, but after conducting extensive research, I could not find any specific references or resources that mention Truong‐Van Luu's conceptual contributions to SWOT analysis. It's possible that you may have mistaken the name, or this individual's work might not be widely recognized or available online. Please provide more specific details if available.
Top_P 0.5	Fuzzy Quantitative SWOT	0	0	0	0	0	0		I'm sorry, but after extensive research, I was unable to find any specific references or information regarding Lee Kuo-liang's conceptual contributions to SWOT analysis. It's possible that you may have mistaken the name or the contribution. Please provide more details or check the information.
Top_P 0.5	Focused SWOT	1	1	0	0	0	0		I'm sorry, but I couldn't find any specific references or contributions made by Alex Coman to SWOT analysis. It's possible that you may have confused the name or the contribution. Alex Coman is known for his work in project management and technology innovation, but there doesn't seem to be any direct link between him and SWOT analysis. Please provide more specific information.
Top_P 0.5	Augmented SWOT analysis	0	0	0	0	0	0		I'm sorry, but I couldn't find any specific references or contributions made by Weisheng Lu to SWOT analysis. It's possible that you may have confused the name or the field of study. Weisheng Lu is a Professor in the Department of Real Estate and Construction at The University of Hong Kong. His research primarily focuses on construction management and information technology in construction.
Top_P 0.5	AHP-SWOT	2	1	0	0	1	0		Eduardas Kazimieras Zavadskas is a Lithuanian researcher known for his work in multiple-criteria decision-making (MCDM) and operations research. While he has not directly contributed to the conceptual development of SWOT analysis, he has made significant contributions to the field of decision-making analysis, which can be applied to SWOT analysis. 1. Zavadskas, E. K., Turskis, Z., & Kildienė, S. …
Top_P 0.5	SWOT 3 x 3 matrix	0	0	0	0	0	0		I'm sorry, but I couldn't find any specific references or contributions made by M. Konstanciak to SWOT analysis. It's possible that you may have misspelled the name or there might be some confusion about the person in question. SWOT analysis is a well-known strategic planning tool and many scholars have contributed to its development and application, but without the correct details, it's challeng…
Top_P 0.5	Meta-SWOT	1	1	0	0	0	0		I'm sorry, but after conducting extensive research, I couldn't find any specific references or contributions made by Ravi Agarwal to the concept of SWOT analysis. It's possible that you may have confused the individual in question with someone else or there might be a misunderstanding about their contributions. Ravi Agarwal is a well-known figure in the field of mathematics, but there's no availa…
Top_P 0.5	SWONT	0	0	0	0	0	0		I'm sorry, but after extensive research, I couldn't find any specific contributions by Gaston de los Reyes to the concept of SWOT analysis. Gaston de los Reyes is an Associate Professor of Strategic Management and Public Policy at George Washington University, and his work primarily focuses on environmental sustainability, business ethics, and corporate governance. However, there doesn't seem to …
Top_P 0.5	Climate SWOT	0	0	0	0	0	0		I'm sorry, but I couldn't find any specific references or contributions made by Hanna-Leena Pesonen to the concept of SWOT analysis. It's possible that you may have mistaken the person or the concept. Hanna-Leena Pesonen is a known figure in the field of sustainable business and corporate responsibility, but her work doesn't seem to be directly related to SWOT analysis.
Top_P 0.5	SVOR	2	1	0	0	1	0		Olivier Mesly is a professor of marketing and a researcher who has made significant contributions to the field of SWOT analysis. His work is focused on improving the use of SWOT analysis in strategic planning and decision-making. In his book "Creating Models in Psychological Research" (2015), Mesly introduces a new approach to SWOT analysis, which he calls "3D SWOT". This approach is designed to …
Top_P 0.5	SWUF analysis	0	0	0	0	0	0		After extensive research, it appears that there might be some confusion. J. Siciliano does not appear to have made any notable contributions to the concept of SWOT analysis. The SWOT analysis is a strategic planning tool that was developed in the 1960s by Albert Humphrey, not J. Siciliano. The SWOT analysis involves identifying the Strengths, Weaknesses, Opportunities, and Threats related to a bu…
Top_P 0.5	SMART SWOT	0	0	0	0	0	0		I'm sorry, but I couldn't find any specific references or contributions made by Chun-Min Kuo to SWOT analysis. It's possible that you may have confused the name or the field of study. Chun-Min Kuo is a name associated with several fields, including engineering and medicine, but there doesn't seem to be a direct link to SWOT analysis or business strategy. If you have more specific information or a…
Top_P 0.5	Importance/Performance Analysis	5	1	1	1	1	1		Boonyarat Phadermrod, Infante, and Chapman (2019) proposed a comprehensive SWOT analysis framework for the strategic planning of digital marketing. Their work provides a detailed methodology for performing SWOT analysis in the context of digital marketing, which includes the identification, categorization, and prioritization of internal and external factors. They also introduced the use of the An…
Top_P 0.5	Correlative SWOT Analysis	1	1	0	0	0	0		Charis Vlados is a professor and researcher known for his work in the field of socio-economic development, innovation, and competitiveness. However, after extensive research, there is no specific reference or evidence found that directly links Charis Vlados to conceptual contributions to SWOT analysis. SWOT analysis is a well-established business strategy tool that has been around since the 1960s…
Top_P 0.5	RE-SWOT	0	0	0	0	0	0		After extensive research, it appears that Fabiano Dalpiaz, a computer science researcher known for his work in requirements engineering and software engineering, has not made any specific contributions to the concept of SWOT analysis. SWOT analysis is a strategic planning tool used in business to identify strengths, weaknesses, opportunities, and threats, and does not appear to be a focus of Dalp…
Top_P 0.1	SOFT Approach	0	0	0	0	0	0		I'm sorry, but I couldn't find any specific references or contributions made by Robert F. Stewart to SWOT analysis. It's possible that you may have confused the name or there might be a misunderstanding. SWOT analysis was developed by Albert Humphrey in the 1960s. If you have any other requests or need information on a different topic, feel free to ask!
Top_P 0.1	Organized Entrepreneurship	0	0	0	0	0	0		I'm sorry, but I couldn't find any specific references or contributions made by J.D. McConnell to SWOT analysis. It's possible that you may have confused the name or there might be a misunderstanding. The SWOT analysis concept is generally attributed to Albert Humphrey, who led a convention at the Stanford Research Institute (now SRI International) in the 1960s and 1970s using data from Fortune 5…
Top_P 0.1	PIPOS framework	0	0	0	0	0	0		I'm sorry, but I couldn't find any specific references or contributions made by Kjell-Arne Ringbakk to SWOT analysis. It's possible that you may have misspelled the name or confused it with another individual. SWOT analysis is a widely used strategic planning tool, and many people have contributed to its development and use. However, without more specific information, it's difficult to identify K…
Top_P 0.1	"SWOT" analysis	0	0	0	0	0	0		I'm sorry, but I couldn't find any specific references or contributions made by Ian A. Mottershaw to SWOT analysis. It's possible that you may have misspelled the name or confused it with another individual. SWOT analysis is a widely used strategic planning tool, and many scholars and business professionals have contributed to its development and use. However, without more specific information, i…
Top_P 0.1	Participative planning	2	1	0	0	1	0		Albert S. Humphrey is often credited with developing the SWOT analysis during the 1960s and 1970s while he was working at the Stanford Research Institute. However, there is some debate about this, as Humphrey himself never claimed to have invented the SWOT analysis, and there are no documents from his time at Stanford that mention the SWOT analysis. 1. "Albert Humphrey is credited with first intr…
Top_P 0.1	SWOT analysis	1	1	0	0	0	0		John Argenti is a renowned figure in the field of strategic management. However, there is no direct evidence or reference that links him to the conceptual contributions to SWOT analysis. SWOT analysis is generally attributed to Albert Humphrey, who developed this strategic planning tool during the 1960s and 1970s. Argenti is more known for his work on corporate planning and corporate failure. His…
Top_P 0.1	Threat/Opportunity analysis	1	1	0	0	0	0		H. Igor Ansoff is a renowned figure in the field of strategic management and is often referred to as the father of strategic management. However, his primary contributions are not directly related to SWOT analysis, but rather to the Ansoff Matrix, a strategic planning tool that provides a framework to help executives, senior managers, and marketers devise strategies for future growth. 1. Ansoff, …
Top_P 0.1	WOTS-UP	1	1	0	0	0	0		George A. Steiner is a renowned figure in the field of strategic planning and management. However, there seems to be a lack of direct references or resources linking him to the conceptual contributions to SWOT analysis. SWOT analysis (Strengths, Weaknesses, Opportunities, Threats) is a strategic planning tool used to help a person or organization identify the Strengths, Weaknesses, Opportunities,…
Top_P 0.1	LCAG framework	4	1	1	0	1	1	X	1. Andrews, K. R. (1971). The concept of corporate strategy. Homewood, IL: Irwin. 2. Andrews, K. R. (1980). The concept of corporate strategy. Homewood, IL: Richard D. Irwin. 3. Andrews, K. R. (1987). The concept of corporate strategy. Homewood, IL: Richard D. Irwin. 4. Andrews, K. R. (1993). The concept of corporate strategy. Homewood, IL: Richard D. Irwin. 5. Andrews, K. R. (1994). The concept …
Top_P 0.1	TOWS matrix	4	1	1	0	1	1		1. Weihrich, H. (1982). The TOWS matrix—A tool for situational analysis. Long Range Planning, 15(2), 54-66. 2. Weihrich, H. (1999). Analyzing the competitive advantages and disadvantages of Germany with the TOWS Matrix—an alternative to Porter's Model. European Business Review, 99(1), 9-22. 3. Weihrich, H. (1982). The TOWS matrix: A tool for situational analysis. Strategic Management: A new view …
Top_P 0.1	SWOPT	2	1	0	0	1	0		1. Day, G. S. (1986). Analysis for strategic market decisions. West Publishing Company. 2. Day, G. S. (1994). The capabilities of market-driven organizations. Journal of marketing, 58(4), 37-52. 3. Day, G. S., & Reibstein, D. J. (1997). Wharton on dynamic competitive strategy. John Wiley & Sons. 4. Day, G. S. (2007). Is it real? Can we win? Is it worth doing? Managing risk and reward in an innova…
Top_P 0.1	QSPM / management text books	3	1	1	0	1	0		Fred R. David is a renowned author and professor who has made significant contributions to the field of strategic management, including the development and application of SWOT analysis. His work has helped to refine and expand the understanding of this tool, making it more effective for organizations in identifying their strengths, weaknesses, opportunities, and threats. 1. David, F. R. (2011). S…
Top_P 0.1	SFAS matrix / management text books	4	1	1	0	1	1		Thomas L. Wheelen is a well-known author in the field of strategic management and has contributed significantly to the development and understanding of SWOT analysis. 1. Wheelen, T. L., & Hunger, J. D. (2011). Concepts in strategic management and business policy. Pearson Education India. In this book, Wheelen and Hunger discuss the importance of SWOT analysis in strategic management and business …
Top_P 0.1	SWA	1	1	0	0	0	0		Eliza Ching-Yick Tse is a renowned professor in the field of Hospitality Management. However, after extensive research, there doesn't seem to be any specific references or contributions made by Eliza Ching-Yick Tse to SWOT analysis. Her work primarily revolves around tourism and hospitality management, with a focus on strategic management and marketing. It's possible that she has used SWOT analys…
Top_P 0.1	VRIO framework	5	1	1	1	1	1		Jay Barney is a renowned American professor known for his significant contributions to the field of strategic management. While he did not directly contribute to the development of SWOT analysis, his work on Resource-Based View (RBV) theory has been widely used to enhance the understanding and application of SWOT analysis. 1. Barney, J. (1991). Firm Resources and Sustained Competitive Advantage. …
Top_P 0.1	Dynamic SWOT Analysis	0	0	0	0	0	0		I'm sorry, but I couldn't find any information or references related to a person named T. Richard Dealty contributing to SWOT analysis. It's possible that there might be a mistake in the name you provided. SWOT analysis is generally attributed to Albert Humphrey, who developed this strategic planning tool at Stanford University in the 1960s and 1970s.
Top_P 0.1	SPACE Matrix	1	1	0	0	0	0		I'm sorry, but I couldn't find any specific references or contributions made by Laetitia Radder to SWOT analysis. It's possible that you may have confused the person or the topic. Laetitia Radder is a professor in the Department of Marketing Management at Nelson Mandela University and her research interests include consumer behavior, marketing research, and marketing management. However, there is…
Top_P 0.1	Knowledge-based SWOT Analysis	1	1	0	0	0	0		I'm sorry, but after extensive research, I couldn't find any specific references or contributions made by Geert-Jan Houben to SWOT analysis. Geert-Jan Houben is a well-known figure in the field of web information systems, user modeling, and personalization, but there doesn't seem to be any direct link between his work and SWOT analysis. It's possible that you may have confused him with another ex…
Top_P 0.1	A'WOT	3	1	0	0	1	1		After conducting extensive research, it appears that Mikko Kurttila has not made any significant conceptual contributions specifically to SWOT analysis. Mikko Kurttila is a researcher who has written extensively on topics related to forestry and environmental decision making. His work often involves the use of SWOT analysis as a tool, but he does not appear to have made any notable theoretical co…
Top_P 0.1	Strategy Formulation Framework (SWOT, BSC & QFD)	1	1	0	0	0	0		I'm sorry, but after extensive research, I couldn't find any specific references or contributions made by Andrew Sai On Ko to SWOT analysis. It's possible that you may have confused him with someone else or there might be a misunderstanding about his work. Andrew Sai On Ko is a professor at the University of Washington's Information School, and his research primarily focuses on computing educatio…
Top_P 0.1	Group-based SWOT analysis	0	0	0	0	0	0		I'm sorry, but after extensive research, I couldn't find any specific references or resources that mention Bernhard Gibis's conceptual contributions to SWOT analysis. It's possible that you may have confused the person or the topic. Please provide more details or check the information again.
Top_P 0.1	Resource-based SWOT	0	0	0	0	0	0		I'm sorry, but I couldn't find any specific references or contributions made by Erhard K. Valentin to SWOT analysis. It's possible that you may have mistaken the name, or that his work is not widely recognized or easily accessible online. SWOT analysis is a widely used strategic planning tool, and many business professionals and academics have contributed to its development and use. However, the …
Top_P 0.1	SWOT & AHP analysis	0	0	0	0	0	0		I'm sorry, but after extensive research, I couldn't find any specific references or contributions made by Rodney A. Stewart to the concept of SWOT analysis. It's possible that you may have confused the name or the field of expertise. Rodney A. Stewart is a well-known figure in the field of water and energy efficiency research. If you have any other questions or need information on a different top…
Top_P 0.1	SWOT & SRA approach	2	1	0	0	1	0		Jan Emblemsvåg is a Norwegian industrial economist and management consultant who has contributed significantly to the field of strategic management, particularly in the area of SWOT analysis. 1. Emblemsvåg, J. (2020). The augmented SWOT analysis. Journal of Strategy and Management. In this paper, Emblemsvåg proposed an augmented SWOT analysis that incorporates risk management and life-cycle think…
Top_P 0.1	S-O-S approach	1	1	0	0	0	0		After extensive research, there doesn't appear to be any specific references or resources that directly link Jyrki Kangas to conceptual contributions to SWOT analysis. Jyrki Kangas is a well-known figure in the field of forestry science and has contributed significantly to the field, particularly in the areas of forest policy and planning. However, there's no clear evidence of his direct contribu…
Top_P 0.1	STAW	0	0	0	0	0	0		I'm sorry, but I couldn't find any specific references or contributions made by Y.K. Ip to SWOT analysis. It's possible that you may have confused the name or there might be a spelling mistake. SWOT analysis is a well-known strategic planning tool, but there doesn't seem to be any direct link to Y.K. Ip. Please provide more specific details if available.
Top_P 0.1	Dual-perspective SWOT	1	1	0	0	0	0		I'm sorry, but after extensive research, I couldn't find any specific references or contributions made by Milorad M. Novicevic to SWOT analysis. It's possible that you may have confused the person or the concept. Milorad M. Novicevic is a professor of management and has written extensively on leadership and management topics, but his work doesn't appear to focus on SWOT analysis.
Top_P 0.1	Participatory (SWOT) analysis	0	0	0	0	0	0		After extensive research, it appears that there may be some confusion regarding Herman Mollenhorst's contributions to SWOT analysis. SWOT analysis, which stands for Strengths, Weaknesses, Opportunities, and Threats, is a strategic planning tool that was developed in the 1960s by Albert Humphrey at the Stanford Research Institute. There is no widely recognized or documented evidence to suggest tha…
Top_P 0.1	Telescopic observations framework	0	0	0	0	0	0		I'm sorry, but I couldn't find any specific references or contributions made by George Panagiotou to SWOT analysis. It's possible that you may have mistaken the name or the contribution. Please provide more details.
Top_P 0.1	Quantitative SWOT analysis	5	1	1	1	1	1		Hiroshi Shinno is a renowned scholar who has made significant contributions to the field of strategic management, particularly in the development and application of SWOT analysis. His work has been instrumental in refining the SWOT analysis methodology and its application in various fields. 1. Shinno, H., Yoshioka, H., Marpaung, S., & Hachiga, S. (2006). Quantitative SWOT analysis on global compe…
Top_P 0.1	ANP-SWOT	0	0	0	0	0	0		I'm sorry, but I couldn't find any specific references or contributions made by İhsan Yüksel to SWOT analysis. It's possible that you may have misspelled the name or there might be a misunderstanding. SWOT analysis is a well-known strategic planning tool, and many scholars have contributed to its development and application. However, without more specific information, it's challenging to identify…
Top_P 0.1	Fuzzy SWOT / SWOT review paper	5	1	1	1	1	1		Sepehr Ghazinoory is a prominent figure in the field of strategic management and has made significant contributions to the understanding and application of SWOT analysis. Here are some references to his work: 1. Ghazinoory, S., Abdi, M., & Azadegan-Mehr, M. (2011). Swot methodology: a state-of-the-art review for the past, a framework for the future. Journal of business economics and management, 1…
Top_P 0.1	SOAR	1	1	0	0	0	0		I'm sorry, but after extensive research, I could not find any specific references or contributions made by Jen Hetzel Silbert to the concept of SWOT analysis. Jen Hetzel Silbert is a known leadership coach and founder of Learning Innovations Laboratory (LILA) at Harvard University, but her work appears to be more focused on leadership development, learning, and organizational change rather than S…
Top_P 0.1	Enhanced SWOT analysis framework	1	1	0	0	0	0		I'm sorry, but I couldn't find any specific references or contributions made by Noga Collins Kreiner to SWOT analysis. It's possible that you may have confused the name or the field of study. Noga Collins-Kreiner is a known researcher in the field of tourism and geography. If you have any other requests or need information on a different topic, feel free to ask!
Top_P 0.1	Double house of Quality	0	0	0	0	0	0		I'm sorry, but I couldn't find any specific references or contributions made by Leung Chee Koo to SWOT analysis. It's possible that you may have misspelled the name or there might be a misunderstanding. SWOT analysis is a well-known strategic planning tool, and many scholars and business professionals have contributed to its development and application. However, the specific contributions of Leun…
Top_P 0.1	The BSC-oriented SWOT matrix	0	0	0	0	0	0		I'm sorry, but I couldn't find any specific references or contributions made by Truong-Van Luu to SWOT analysis. It's possible that you may have confused the name or there might be a spelling mistake. SWOT analysis is a well-known strategic planning tool, and many scholars have contributed to its development and application. However, without the correct information, it's challenging to provide th…
Top_P 0.1	Fuzzy Quantitative SWOT	0	0	0	0	0	0		I'm sorry, but after extensive research, I couldn't find any specific references or contributions made by Lee Kuo-liang to SWOT analysis. It's possible that you may have confused the name or there might be a spelling error. SWOT analysis was developed by Albert Humphrey in the 1960s, and many business strategists and scholars have contributed to its development since then. However, Lee Kuo-liang …
Top_P 0.1	Focused SWOT	0	0	0	0	0	0		I'm sorry, but I couldn't find any specific references or contributions made by Alex Coman to SWOT analysis. It's possible that you may have mistaken the name or the person in question might not have made significant contributions to this field. SWOT analysis is a widely used strategic planning tool and many business strategists and scholars have contributed to its development and application, bu…
Top_P 0.1	Augmented SWOT analysis	0	0	0	0	0	0		I'm sorry, but after extensive research, I couldn't find any specific references or contributions made by Weisheng Lu to the concept of SWOT analysis. Weisheng Lu is a well-known scholar in the field of construction and real estate, with numerous publications on construction management, project management, and sustainable development. However, there doesn't seem to be any direct link between him …
Top_P 0.1	AHP-SWOT	2	1	0	0	1	0		E.K. Zavadskas is a well-known researcher in the field of decision-making and multi-criteria decision-making (MCDM) methods. While he has made significant contributions to these fields, there is no direct evidence or reference to suggest that he has made conceptual contributions specifically to SWOT analysis. His work primarily revolves around the development and application of MCDM methods, such…
Top_P 0.1	SWOT 3 x 3 matrix	0	0	0	0	0	0		I'm sorry, but I couldn't find any specific references or contributions made by an individual named M. Konstanciak to SWOT analysis. It's possible that you may have misspelled the name or the person you're referring to is not widely recognized in this field. SWOT analysis is a widely used strategic planning tool and many people have contributed to its development and use. However, the most recogn…
Top_P 0.1	Meta-SWOT	1	1	0	0	0	0		I'm sorry, but I couldn't find any specific references or contributions made by Ravi Agarwal to SWOT analysis. It's possible that you may have confused the name or the field of study. Ravi Agarwal is a well-known figure in the field of mathematics, but there's no available information or resources linking him to SWOT analysis, a strategic planning tool used in business. Please provide additional …
Top_P 0.1	SWONT	1	1	0	0	0	0		I'm sorry, but after extensive research, I couldn't find any specific references or contributions made by Gaston de los Reyes to SWOT analysis. It's possible that you may have confused the person or the concept. Gaston de los Reyes is a known scholar in the field of business ethics and environmental sustainability, but his work doesn't appear to be directly related to SWOT analysis.
Top_P 0.1	Climate SWOT	0	0	0	0	0	0		I'm sorry, but after extensive research, I couldn't find any specific references or contributions made by Hanna-Leena Pesonen to the concept of SWOT analysis. It's possible that you may have confused the person in question or the concept they contributed to. Please provide more details or check the information.
Top_P 0.1	SVOR	1	1	0	0	0	0		After conducting extensive research, it appears that Olivier Mesly has not made any significant or widely recognized contributions to the concept of SWOT analysis. Mesly is a known researcher in the field of marketing and has contributed to the understanding of predatory marketing. However, there are no specific references or publications linking him to the development or enhancement of SWOT anal…
Top_P 0.1	SWUF analysis	0	0	0	0	0	0		I'm sorry, but after extensive research, I couldn't find any specific references or contributions made by J. Siciliano to the concept of SWOT analysis. It's possible that there might be some confusion about the name or the field of study. SWOT analysis is a strategic planning technique used to help a person or organization identify strengths, weaknesses, opportunities, and threats related to busi…
Top_P 0.1	SMART SWOT	0	0	0	0	0	0		I'm sorry, but after extensive research, I couldn't find any specific references or contributions made by Chun-Min Kuo to SWOT analysis. It's possible that you may have confused the name or the field of study. Chun-Min Kuo is a name associated with several fields, including engineering and medicine, but there doesn't appear to be a direct link to SWOT analysis. Please provide additional details i…
Top_P 0.1	Importance/Performance Analysis	1	1	0	0	0	0		I'm sorry, but I couldn't find any specific references or contributions made by Boonyarat Phadermrod to the concept of SWOT analysis. It's possible that you may have misspelled the name or confused it with someone else. Boonyarat Phadermrod is known for his work in the field of Information Technology and Cybersecurity, particularly in the context of risk assessment and management. However, his wo…
Top_P 0.1	Correlative SWOT Analysis	1	1	0	0	0	0		Charis Vlados is a Professor of Management Strategy and Innovation Dynamics at the University of Piraeus, Greece. He has contributed to the field of SWOT analysis through his research and publications. However, there seems to be no specific reference or document available online that directly links Charis Vlados to a conceptual contribution to the SWOT analysis. His work primarily focuses on inno…
Top_P 0.1	RE-SWOT	0	0	0	0	0	0		I'm sorry, but after extensive research, I couldn't find any specific contributions made by Fabiano Dalpiaz to the concept of SWOT analysis. Fabiano Dalpiaz is a well-known figure in the field of requirements engineering and goal-oriented modeling, but there doesn't seem to be any direct link between his work and SWOT analysis.

## Sheet: Statistics
Formulas	Dataset 1	Dataset 2	Dataset 3	Dataset 4
Bottom mean line	0	0	0	0
Top mean line (max Y)	1.87085	1.71601	1.62554	1.91923
Mean (x̄)	1.08	1.24	1.22	1.14
Standard deviation (σ)	1.50785	1.6439	1.7354	1.46983
Sample size	50	50	50	50
Confidence level	0.95	0.95	0.95	0.95
Alpha	0.05	0.05	0.05	0.05
Alpha/2	0.025	0.025	0.025	0.025
Critical value (Z)	1.95996	1.95996	1.95996	1.95996
Standard error	0.213242	0.232482	0.245422	0.207865
Margin of error	0.417946	0.455657	0.481018	0.407409
Lower limit	0.662054	0.784343	0.738982	0.732591
Upper limit	1.49795	1.69566	1.70102	1.54741
	Dataset 1	Dataset 2	Dataset 3	Dataset 4		Score	Probability density dataset 1	Y- axis mean 1	CI lower 1	CI upper 1	Probability density dataset 2	Y-axis mean 2	CI lower 2	CI upper 2	Probability density dataset 3	Y-as mean 3	CI lower 3	CI upper 3	Probability density dataset 4	Y-axis mean 4	CI lower 4	CI upper 4
	0	0	0	0		0	5.03506e-06	1.87085	5.03506e-06	-100	1.1401e-06	1.71601	1.1401e-06	-100	6.99915e-06	1.62554	6.99915e-06	-100	5.64709e-07	1.91923	5.64709e-07	-100
	0	0	0	0		0.01	6.37788e-06	1.87085	6.37788e-06	-100	1.43279e-06	1.71601	1.43279e-06	-100	8.5635e-06	1.62554	8.5635e-06	-100	7.34356e-07	1.91923	7.34356e-07	-100
	0	0	0	0		0.02	8.06106e-06	1.87085	8.06106e-06	-100	1.79727e-06	1.71601	1.79727e-06	-100	1.04601e-05	1.62554	1.04601e-05	-100	9.52759e-07	1.91923	9.52759e-07	-100
	0	0	0	0		0.03	1.01661e-05	1.87085	1.01661e-05	-100	2.25032e-06	1.71601	2.25032e-06	-100	1.27556e-05	1.62554	1.27556e-05	-100	1.23326e-06	1.91923	1.23326e-06	-100
	1	2	1	2		0.04	1.27926e-05	1.87085	1.27926e-05	-100	2.81235e-06	1.71601	2.81235e-06	-100	1.5529e-05	1.62554	1.5529e-05	-100	1.59265e-06	1.91923	1.59265e-06	-100
	1	1	2	1		0.05	1.60624e-05	1.87085	1.60624e-05	-100	3.50826e-06	1.71601	3.50826e-06	-100	1.8874e-05	1.62554	1.8874e-05	-100	2.05202e-06	1.91923	2.05202e-06	-100
	1	0	1	1		0.06	2.01236e-05	1.87085	2.01236e-05	-100	4.36829e-06	1.71601	4.36829e-06	-100	2.29016e-05	1.62554	2.29016e-05	-100	2.63778e-06	1.91923	2.63778e-06	-100
	2	3	3	1		0.07	2.51563e-05	1.87085	2.51563e-05	-100	5.42908e-06	1.71601	5.42908e-06	-100	2.77425e-05	1.62554	2.77425e-05	-100	3.3829e-06	1.91923	3.3829e-06	-100
	4	4	4	4		0.08	3.13785e-05	1.87085	3.13785e-05	-100	6.73501e-06	1.71601	6.73501e-06	-100	3.35509e-05	1.62554	3.35509e-05	-100	4.32847e-06	1.91923	4.32847e-06	-100
	3	5	5	4		0.09	3.90538e-05	1.87085	3.90538e-05	-100	8.33962e-06	1.71601	8.33962e-06	-100	4.0508e-05	1.62554	4.0508e-05	-100	5.52555e-06	1.91923	5.52555e-06	-100
	2	2	5	2		0.1	4.84996e-05	1.87085	4.84996e-05	-100	1.03074e-05	1.71601	1.03074e-05	-100	4.88267e-05	1.62554	4.88267e-05	-100	7.03738e-06	1.91923	7.03738e-06	-100
	3	3	3	3		0.11	6.00979e-05	1.87085	6.00979e-05	-100	1.27161e-05	1.71601	1.27161e-05	-100	5.87562e-05	1.62554	5.87562e-05	-100	8.94214e-06	1.91923	8.94214e-06	-100
	2	3	4	4		0.12	7.43061e-05	1.87085	7.43061e-05	-100	1.56585e-05	1.71601	1.56585e-05	-100	7.05875e-05	1.62554	7.05875e-05	-100	1.13362e-05	1.91923	1.13362e-05	-100
	1	1	1	1		0.13	9.16715e-05	1.87085	9.16715e-05	-100	1.92462e-05	1.71601	1.92462e-05	-100	8.46606e-05	1.62554	8.46606e-05	-100	1.4338e-05	1.91923	1.4338e-05	-100
	5	5	5	5		0.14	0.000112847	1.87085	0.000112847	-100	2.36121e-05	1.71601	2.36121e-05	-100	0.000101371	1.62554	0.000101371	-100	1.80926e-05	1.91923	1.80926e-05	-100
	0	0	0	0		0.15	0.000138608	1.87085	0.000138608	-100	2.89149e-05	1.71601	2.89149e-05	-100	0.000121178	1.62554	0.000121178	-100	2.27778e-05	1.91923	2.27778e-05	-100
	0	1	0	1		0.16	0.000169877	1.87085	0.000169877	-100	3.53432e-05	1.71601	3.53432e-05	-100	0.000144616	1.62554	0.000144616	-100	2.86099e-05	1.91923	2.86099e-05	-100
	0	1	0	1		0.17	0.000207742	1.87085	0.000207742	-100	4.31207e-05	1.71601	4.31207e-05	-100	0.0001723	1.62554	0.0001723	-100	3.58523e-05	1.91923	3.58523e-05	-100
	3	1	1	3		0.18	0.000253489	1.87085	0.000253489	-100	5.25124e-05	1.71601	5.25124e-05	-100	0.000204943	1.62554	0.000204943	-100	4.48241e-05	1.91923	4.48241e-05	-100
	1	0	1	1		0.19	0.000308631	1.87085	0.000308631	-100	6.38315e-05	1.71601	6.38315e-05	-100	0.000243366	1.62554	0.000243366	-100	5.59114e-05	1.91923	5.59114e-05	-100
	1	1	0	0		0.2	0.000374942	1.87085	0.000374942	-100	7.74469e-05	1.71601	7.74469e-05	-100	0.000288514	1.62554	0.000288514	-100	6.95801e-05	1.91923	6.95801e-05	-100
	0	0	0	0		0.21	0.0004545	1.87085	0.0004545	-100	9.37929e-05	1.71601	9.37929e-05	-100	0.000341469	1.62554	0.000341469	-100	8.63901e-05	1.91923	8.63901e-05	-100
	0	0	0	0		0.22	0.000549728	1.87085	0.000549728	-100	0.000113379	1.71601	0.000113379	-100	0.000403474	1.62554	0.000403474	-100	0.000107013	1.91923	0.000107013	-100
	1	2	2	2		0.23	0.000663449	1.87085	0.000663449	-100	0.000136802	1.71601	0.000136802	-100	0.000475947	1.62554	0.000475947	-100	0.000132254	1.91923	0.000132254	-100
	5	5	1	1		0.24	0.000798936	1.87085	0.000798936	-100	0.000164758	1.71601	0.000164758	-100	0.000560507	1.62554	0.000560507	-100	0.000163069	1.91923	0.000163069	-100
	0	0	0	0		0.25	0.000959978	1.87085	0.000959978	-100	0.000198061	1.71601	0.000198061	-100	0.000658995	1.62554	0.000658995	-100	0.000200599	1.91923	0.000200599	-100
	0	1	0	1		0.26	0.00115095	1.87085	0.00115095	-100	0.000237655	1.71601	0.000237655	-100	0.000773503	1.62554	0.000773503	-100	0.000246197	1.91923	0.000246197	-100
	0	0	0	0		0.27	0.00137687	1.87085	0.00137687	-100	0.000284637	1.71601	0.000284637	-100	0.000906402	1.62554	0.000906402	-100	0.000301461	1.91923	0.000301461	-100
	0	0	0	0		0.28	0.00164353	1.87085	0.00164353	-100	0.000340276	1.71601	0.000340276	-100	0.00106037	1.62554	0.00106037	-100	0.000368277	1.91923	0.000368277	-100
	5	5	5	5		0.29	0.00195753	1.87085	0.00195753	-100	0.000406041	1.71601	0.000406041	-100	0.00123844	1.62554	0.00123844	-100	0.000448862	1.91923	0.000448862	-100
	0	1	0	0		0.3	0.00232638	1.87085	0.00232638	-100	0.000483619	1.71601	0.000483619	-100	0.00144401	1.62554	0.00144401	-100	0.000545816	1.91923	0.000545816	-100
	5	5	5	5		0.31	0.00275867	1.87085	0.00275867	-100	0.000574955	1.71601	0.000574955	-100	0.00168092	1.62554	0.00168092	-100	0.000662177	1.91923	0.000662177	-100
	0	1	0	1		0.32	0.0032641	1.87085	0.0032641	-100	0.000682277	1.71601	0.000682277	-100	0.00195344	1.62554	0.00195344	-100	0.000801488	1.91923	0.000801488	-100
	0	1	0	1		0.33	0.00385365	1.87085	0.00385365	-100	0.000808136	1.71601	0.000808136	-100	0.00226638	1.62554	0.00226638	-100	0.000967865	1.91923	0.000967865	-100
	0	0	0	0		0.34	0.00453969	1.87085	0.00453969	-100	0.000955442	1.71601	0.000955442	-100	0.00262509	1.62554	0.00262509	-100	0.00116608	1.91923	0.00116608	-100
	0	0	0	0		0.35	0.00533611	1.87085	0.00533611	-100	0.00112751	1.71601	0.00112751	-100	0.00303553	1.62554	0.00303553	-100	0.00140163	1.91923	0.00140163	-100
	1	0	0	0		0.36	0.00625846	1.87085	0.00625846	-100	0.00132811	1.71601	0.00132811	-100	0.00350433	1.62554	0.00350433	-100	0.00168088	1.91923	0.00168088	-100
	1	0	1	0		0.37	0.00732413	1.87085	0.00732413	-100	0.0015615	1.71601	0.0015615	-100	0.00403881	1.62554	0.00403881	-100	0.0020111	1.91923	0.0020111	-100
	1	0	0	0		0.38	0.00855243	1.87085	0.00855243	-100	0.00183252	1.71601	0.00183252	-100	0.00464709	1.62554	0.00464709	-100	0.00240064	1.91923	0.00240064	-100
	1	4	2	2		0.39	0.00996477	1.87085	0.00996477	-100	0.0021466	1.71601	0.0021466	-100	0.00533811	1.62554	0.00533811	-100	0.002859	1.91923	0.002859	-100
	0	0	0	0		0.4	0.0115849	1.87085	0.0115849	-100	0.00250986	1.71601	0.00250986	-100	0.00612171	1.62554	0.00612171	-100	0.003397	1.91923	0.003397	-100
	0	1	1	1		0.41	0.0134387	1.87085	0.0134387	-100	0.00292917	1.71601	0.00292917	-100	0.0070087	1.62554	0.0070087	-100	0.00402691	1.91923	0.00402691	-100
	1	1	0	1		0.42	0.015555	1.87085	0.015555	-100	0.00341221	1.71601	0.00341221	-100	0.00801089	1.62554	0.00801089	-100	0.00476259	1.91923	0.00476259	-100
	0	0	0	0		0.43	0.0179651	1.87085	0.0179651	-100	0.00396757	1.71601	0.00396757	-100	0.0091412	1.62554	0.0091412	-100	0.00561966	1.91923	0.00561966	-100
	1	0	2	1		0.44	0.0207029	1.87085	0.0207029	-100	0.00460478	1.71601	0.00460478	-100	0.0104137	1.62554	0.0104137	-100	0.00661563	1.91923	0.00661563	-100
	0	0	0	0		0.45	0.0238056	1.87085	0.0238056	-100	0.00533445	1.71601	0.00533445	-100	0.0118436	1.62554	0.0118436	-100	0.00777012	1.91923	0.00777012	-100
	0	0	0	0		0.46	0.0273132	1.87085	0.0273132	-100	0.00616833	1.71601	0.00616833	-100	0.0134476	1.62554	0.0134476	-100	0.00910497	1.91923	0.00910497	-100
	0	0	5	1		0.47	0.0312687	1.87085	0.0312687	-100	0.00711937	1.71601	0.00711937	-100	0.0152434	1.62554	0.0152434	-100	0.0106445	1.91923	0.0106445	-100
	2	2	1	1		0.48	0.0357184	1.87085	0.0357184	-100	0.00820185	1.71601	0.00820185	-100	0.0172504	1.62554	0.0172504	-100	0.0124155	1.91923	0.0124155	-100
	0	0	0	0		0.49	0.0407117	1.87085	0.0407117	-100	0.00943145	1.71601	0.00943145	-100	0.0194893	1.62554	0.0194893	-100	0.0144478	1.91923	0.0144478	-100
						0.5	0.0463011	1.87085	0.0463011	-100	0.0108254	1.71601	0.0108254	-100	0.0219822	1.62554	0.0219822	-100	0.0167738	1.91923	0.0167738	-100
						0.51	0.0525423	1.87085	0.0525423	-100	0.0124023	1.71601	0.0124023	-100	0.0247528	1.62554	0.0247528	-100	0.0194293	1.91923	0.0194293	-100
						0.52	0.0594937	1.87085	0.0594937	-100	0.0141827	1.71601	0.0141827	-100	0.0278265	1.62554	0.0278265	-100	0.0224532	1.91923	0.0224532	-100
						0.53	0.0672168	1.87085	0.0672168	-100	0.0161887	1.71601	0.0161887	-100	0.0312299	1.62554	0.0312299	-100	0.0258876	1.91923	0.0258876	-100
						0.54	0.0757757	1.87085	0.0757757	-100	0.0184442	1.71601	0.0184442	-100	0.0349914	1.62554	0.0349914	-100	0.0297785	1.91923	0.0297785	-100
						0.55	0.0852367	1.87085	0.0852367	-100	0.0209752	1.71601	0.0209752	-100	0.0391409	1.62554	0.0391409	-100	0.0341749	1.91923	0.0341749	-100
						0.56	0.0956684	1.87085	0.0956684	-100	0.0238094	1.71601	0.0238094	-100	0.0437099	1.62554	0.0437099	-100	0.0391298	1.91923	0.0391298	-100
						0.57	0.107141	1.87085	0.107141	-100	0.0269766	1.71601	0.0269766	-100	0.0487313	1.62554	0.0487313	-100	0.0446994	1.91923	0.0446994	-100
						0.58	0.119725	1.87085	0.119725	-100	0.0305085	1.71601	0.0305085	-100	0.0542393	1.62554	0.0542393	-100	0.0509438	1.91923	0.0509438	-100
						0.59	0.133494	1.87085	0.133494	-100	0.0344392	1.71601	0.0344392	-100	0.0602699	1.62554	0.0602699	-100	0.0579264	1.91923	0.0579264	-100
						0.6	0.14852	1.87085	0.14852	-100	0.0388044	1.71601	0.0388044	-100	0.0668598	1.62554	0.0668598	-100	0.0657136	1.91923	0.0657136	-100
						0.61	0.164874	1.87085	0.164874	-100	0.0436421	1.71601	0.0436421	-100	0.0740472	1.62554	0.0740472	-100	0.0743755	1.91923	0.0743755	-100
						0.62	0.182626	1.87085	0.182626	-100	0.0489921	1.71601	0.0489921	-100	0.0818712	1.62554	0.0818712	-100	0.0839844	1.91923	0.0839844	-100
						0.63	0.201845	1.87085	0.201845	-100	0.0548964	1.71601	0.0548964	-100	0.0903718	1.62554	0.0903718	-100	0.0946156	1.91923	0.0946156	-100
						0.64	0.222597	1.87085	0.222597	-100	0.0613985	1.71601	0.0613985	-100	0.0995895	1.62554	0.0995895	-100	0.106346	1.91923	0.106346	-100
						0.65	0.244943	1.87085	0.244943	-100	0.0685438	1.71601	0.0685438	-100	0.109565	1.62554	0.109565	-100	0.119255	1.91923	0.119255	-100
						0.66	0.268941	1.87085	0.268941	-100	0.0763791	1.71601	0.0763791	-100	0.12034	1.62554	0.12034	-100	0.133421	1.91923	0.133421	-100
						0.67	0.29464	1.87085	-100	-100	0.0849529	1.71601	0.0849529	-100	0.131956	1.62554	0.131956	-100	0.148925	1.91923	0.148925	-100
						0.68	0.322087	1.87085	-100	-100	0.0943143	1.71601	0.0943143	-100	0.144453	1.62554	0.144453	-100	0.165846	1.91923	0.165846	-100
						0.69	0.351317	1.87085	-100	-100	0.104514	1.71601	0.104514	-100	0.157871	1.62554	0.157871	-100	0.184263	1.91923	0.184263	-100
						0.7	0.382357	1.87085	-100	-100	0.115602	1.71601	0.115602	-100	0.172249	1.62554	0.172249	-100	0.204252	1.91923	0.204252	-100
						0.71	0.415226	1.87085	-100	-100	0.127631	1.71601	0.127631	-100	0.187624	1.62554	0.187624	-100	0.225886	1.91923	0.225886	-100
						0.72	0.449931	1.87085	-100	-100	0.14065	1.71601	0.14065	-100	0.204033	1.62554	0.204033	-100	0.249234	1.91923	0.249234	-100
						0.73	0.486464	1.87085	-100	-100	0.154712	1.71601	0.154712	-100	0.22151	1.62554	0.22151	-100	0.27436	1.91923	0.27436	-100
						0.74	0.524809	1.87085	-100	-100	0.169864	1.71601	0.169864	-100	0.240084	1.62554	-100	-100	0.30132	1.91923	-100	-100
						0.75	0.564932	1.87085	-100	-100	0.186156	1.71601	0.186156	-100	0.259784	1.62554	-100	-100	0.330164	1.91923	-100	-100
						0.76	0.606787	1.87085	-100	-100	0.203633	1.71601	0.203633	-100	0.280634	1.62554	-100	-100	0.360934	1.91923	-100	-100
						0.77	0.650312	1.87085	-100	-100	0.222339	1.71601	0.222339	-100	0.302655	1.62554	-100	-100	0.393659	1.91923	-100	-100
						0.78	0.695427	1.87085	-100	-100	0.242315	1.71601	0.242315	-100	0.325862	1.62554	-100	-100	0.428358	1.91923	-100	-100
						0.79	0.742038	1.87085	-100	-100	0.263597	1.71601	-100	-100	0.350266	1.62554	-100	-100	0.465038	1.91923	-100	-100
						0.8	0.790035	1.87085	-100	-100	0.286219	1.71601	-100	-100	0.375874	1.62554	-100	-100	0.503693	1.91923	-100	-100
						0.81	0.839288	1.87085	-100	-100	0.310208	1.71601	-100	-100	0.402685	1.62554	-100	-100	0.544299	1.91923	-100	-100
						0.82	0.889653	1.87085	-100	-100	0.335585	1.71601	-100	-100	0.430693	1.62554	-100	-100	0.586819	1.91923	-100	-100
						0.83	0.940969	1.87085	-100	-100	0.362368	1.71601	-100	-100	0.459884	1.62554	-100	-100	0.631198	1.91923	-100	-100
						0.84	0.993058	1.87085	-100	-100	0.390564	1.71601	-100	-100	0.49024	1.62554	-100	-100	0.677363	1.91923	-100	-100
						0.85	1.04573	1.87085	-100	-100	0.420177	1.71601	-100	-100	0.521732	1.62554	-100	-100	0.725225	1.91923	-100	-100
						0.86	1.09877	1.87085	-100	-100	0.451199	1.71601	-100	-100	0.554326	1.62554	-100	-100	0.774674	1.91923	-100	-100
						0.87	1.15197	1.87085	-100	-100	0.483616	1.71601	-100	-100	0.587979	1.62554	-100	-100	0.825581	1.91923	-100	-100
						0.88	1.2051	1.87085	-100	-100	0.517404	1.71601	-100	-100	0.622641	1.62554	-100	-100	0.8778	1.91923	-100	-100
						0.89	1.2579	1.87085	-100	-100	0.552529	1.71601	-100	-100	0.658252	1.62554	-100	-100	0.931164	1.91923	-100	-100
						0.9	1.31013	1.87085	-100	-100	0.588948	1.71601	-100	-100	0.694746	1.62554	-100	-100	0.985489	1.91923	-100	-100
						0.91	1.36154	1.87085	-100	-100	0.626607	1.71601	-100	-100	0.732046	1.62554	-100	-100	1.04057	1.91923	-100	-100
						0.92	1.41185	1.87085	-100	-100	0.665442	1.71601	-100	-100	0.77007	1.62554	-100	-100	1.09619	1.91923	-100	-100
						0.93	1.4608	1.87085	-100	-100	0.705378	1.71601	-100	-100	0.808725	1.62554	-100	-100	1.15212	1.91923	-100	-100
						0.94	1.50813	1.87085	-100	-100	0.746328	1.71601	-100	-100	0.847911	1.62554	-100	-100	1.2081	1.91923	-100	-100
						0.95	1.55358	1.87085	-100	-100	0.788195	1.71601	-100	-100	0.887521	1.62554	-100	-100	1.26387	1.91923	-100	-100
						0.96	1.59688	1.87085	-100	-100	0.830873	1.71601	-100	-100	0.927441	1.62554	-100	-100	1.31916	1.91923	-100	-100
						0.97	1.63778	1.87085	-100	-100	0.874242	1.71601	-100	-100	0.967548	1.62554	-100	-100	1.37369	1.91923	-100	-100
						0.98	1.67604	1.87085	-100	-100	0.918175	1.71601	-100	-100	1.00772	1.62554	-100	-100	1.42716	1.91923	-100	-100
						0.99	1.71142	1.87085	-100	-100	0.962533	1.71601	-100	-100	1.04781	1.62554	-100	-100	1.47928	1.91923	-100	-100
						1	1.74371	1.87085	-100	-100	1.00717	1.71601	-100	-100	1.08769	1.62554	-100	-100	1.52977	1.91923	-100	-100
						1.01	1.77271	1.87085	-100	-100	1.05193	1.71601	-100	-100	1.12722	1.62554	-100	-100	1.57832	1.91923	-100	-100
						1.02	1.79824	1.87085	-100	-100	1.09664	1.71601	-100	-100	1.16624	1.62554	-100	-100	1.62465	1.91923	-100	-100
						1.03	1.82012	1.87085	-100	-100	1.14114	1.71601	-100	-100	1.20462	1.62554	-100	-100	1.66847	1.91923	-100	-100
						1.04	1.83822	1.87085	-100	-100	1.18526	1.71601	-100	-100	1.24219	1.62554	-100	-100	1.70951	1.91923	-100	-100
						1.05	1.85242	1.87085	-100	-100	1.2288	1.71601	-100	-100	1.27881	1.62554	-100	-100	1.74751	1.91923	-100	-100
						1.06	1.86264	1.87085	-100	-100	1.27159	1.71601	-100	-100	1.31433	1.62554	-100	-100	1.78223	1.91923	-100	-100
						1.07	1.86879	1.87085	-100	-100	1.31344	1.71601	-100	-100	1.34859	1.62554	-100	-100	1.81344	1.91923	-100	-100
						1.08	1.87085	1.87085	-100	-100	1.35415	1.71601	-100	-100	1.38145	1.62554	-100	-100	1.84092	1.91923	-100	-100
						1.09	1.86879	0	-100	-100	1.39355	1.71601	-100	-100	1.41276	1.62554	-100	-100	1.86451	1.91923	-100	-100
						1.1	1.86264		-100	-100	1.43144	1.71601	-100	-100	1.44239	1.62554	-100	-100	1.88403	1.91923	-100	-100
						1.11	1.85242		-100	-100	1.46765	1.71601	-100	-100	1.47019	1.62554	-100	-100	1.89935	1.91923	-100	-100
						1.12	1.83822		-100	-100	1.50199	1.71601	-100	-100	1.49604	1.62554	-100	-100	1.91037	1.91923	-100	-100
						1.13	1.82012		-100	-100	1.53429	1.71601	-100	-100	1.51983	1.62554	-100	-100	1.91701	1.91923	-100	-100
						1.14	1.79824		-100	-100	1.56438	1.71601	-100	-100	1.54143	1.62554	-100	-100	1.91923	1.91923	-100	-100
						1.15	1.77271		-100	-100	1.59212	1.71601	-100	-100	1.56074	1.62554	-100	-100	1.91701	0	-100	-100
						1.16	1.74371		-100	-100	1.61736	1.71601	-100	-100	1.57768	1.62554	-100	-100	1.91037		-100	-100
						1.17	1.71142		-100	-100	1.63996	1.71601	-100	-100	1.59215	1.62554	-100	-100	1.89935		-100	-100
						1.18	1.67604		-100	-100	1.6598	1.71601	-100	-100	1.60409	1.62554	-100	-100	1.88403		-100	-100
						1.19	1.63778		-100	-100	1.67678	1.71601	-100	-100	1.61344	1.62554	-100	-100	1.86451		-100	-100
						1.2	1.59688		-100	-100	1.6908	1.71601	-100	-100	1.62015	1.62554	-100	-100	1.84092		-100	-100
						1.21	1.55358		-100	-100	1.70178	1.71601	-100	-100	1.62419	1.62554	-100	-100	1.81344		-100	-100
						1.22	1.50813		-100	-100	1.70967	1.71601	-100	-100	1.62554	1.62554	-100	-100	1.78223		-100	-100
						1.23	1.4608		-100	-100	1.71442	1.71601	-100	-100	1.62419	0	-100	-100	1.74751		-100	-100
						1.24	1.41185		-100	-100	1.71601	1.71601	-100	-100	1.62015		-100	-100	1.70951		-100	-100
						1.25	1.36154		-100	-100	1.71442	0	-100	-100	1.61344		-100	-100	1.66847		-100	-100
						1.26	1.31013		-100	-100	1.70967		-100	-100	1.60409		-100	-100	1.62465		-100	-100
						1.27	1.2579		-100	-100	1.70178		-100	-100	1.59215		-100	-100	1.57832		-100	-100
						1.28	1.2051		-100	-100	1.6908		-100	-100	1.57768		-100	-100	1.52977		-100	-100
						1.29	1.15197		-100	-100	1.67678		-100	-100	1.56074		-100	-100	1.47928		-100	-100
						1.3	1.09877		-100	-100	1.6598		-100	-100	1.54143		-100	-100	1.42716		-100	-100
						1.31	1.04573		-100	-100	1.63996		-100	-100	1.51983		-100	-100	1.37369		-100	-100
						1.32	0.993058		-100	-100	1.61736		-100	-100	1.49604		-100	-100	1.31916		-100	-100
						1.33	0.940969		-100	-100	1.59212		-100	-100	1.47019		-100	-100	1.26387		-100	-100
						1.34	0.889653		-100	-100	1.56438		-100	-100	1.44239		-100	-100	1.2081		-100	-100
						1.35	0.839288		-100	-100	1.53429		-100	-100	1.41276		-100	-100	1.15212		-100	-100
						1.36	0.790035		-100	-100	1.50199		-100	-100	1.38145		-100	-100	1.09619		-100	-100
						1.37	0.742038		-100	-100	1.46765		-100	-100	1.34859		-100	-100	1.04057		-100	-100
						1.38	0.695427		-100	-100	1.43144		-100	-100	1.31433		-100	-100	0.985489		-100	-100
						1.39	0.650312		-100	-100	1.39355		-100	-100	1.27881		-100	-100	0.931164		-100	-100
						1.4	0.606787		-100	-100	1.35415		-100	-100	1.24219		-100	-100	0.8778		-100	-100
						1.41	0.564932		-100	-100	1.31344		-100	-100	1.20462		-100	-100	0.825581		-100	-100
						1.42	0.524809		-100	-100	1.27159		-100	-100	1.16624		-100	-100	0.774674		-100	-100
						1.43	0.486464		-100	-100	1.2288		-100	-100	1.12722		-100	-100	0.725225		-100	-100
						1.44	0.449931		-100	-100	1.18526		-100	-100	1.08769		-100	-100	0.677363		-100	-100
						1.45	0.415226		-100	-100	1.14114		-100	-100	1.04781		-100	-100	0.631198		-100	-100
						1.46	0.382357		-100	-100	1.09664		-100	-100	1.00772		-100	-100	0.586819		-100	-100
						1.47	0.351317		-100	-100	1.05193		-100	-100	0.967548		-100	-100	0.544299		-100	-100
						1.48	0.322087		-100	-100	1.00717		-100	-100	0.927441		-100	-100	0.503693		-100	-100
						1.49	0.29464		-100	-100	0.962533		-100	-100	0.887521		-100	-100	0.465038		-100	-100
						1.5	0.268941		-100	0.268941	0.918175		-100	-100	0.847911		-100	-100	0.428358		-100	-100
						1.51	0.244943		-100	0.244943	0.874242		-100	-100	0.808725		-100	-100	0.393659		-100	-100
						1.52	0.222597		-100	0.222597	0.830873		-100	-100	0.77007		-100	-100	0.360934		-100	-100
						1.53	0.201845		-100	0.201845	0.788195		-100	-100	0.732046		-100	-100	0.330164		-100	-100
						1.54	0.182626		-100	0.182626	0.746328		-100	-100	0.694746		-100	-100	0.30132		-100	-100
						1.55	0.164874		-100	0.164874	0.705378		-100	-100	0.658252		-100	-100	0.27436		-100	0.27436
						1.56	0.14852		-100	0.14852	0.665442		-100	-100	0.622641		-100	-100	0.249234		-100	0.249234
						1.57	0.133494		-100	0.133494	0.626607		-100	-100	0.587979		-100	-100	0.225886		-100	0.225886
						1.58	0.119725		-100	0.119725	0.588948		-100	-100	0.554326		-100	-100	0.204252		-100	0.204252
						1.59	0.107141		-100	0.107141	0.552529		-100	-100	0.521732		-100	-100	0.184263		-100	0.184263
						1.6	0.0956684		-100	0.0956684	0.517404		-100	-100	0.49024		-100	-100	0.165846		-100	0.165846
						1.61	0.0852367		-100	0.0852367	0.483616		-100	-100	0.459884		-100	-100	0.148925		-100	0.148925
						1.62	0.0757757		-100	0.0757757	0.451199		-100	-100	0.430693		-100	-100	0.133421		-100	0.133421
						1.63	0.0672168		-100	0.0672168	0.420177		-100	-100	0.402685		-100	-100	0.119255		-100	0.119255
						1.64	0.0594937		-100	0.0594937	0.390564		-100	-100	0.375874		-100	-100	0.106346		-100	0.106346
						1.65	0.0525423		-100	0.0525423	0.362368		-100	-100	0.350266		-100	-100	0.0946156		-100	0.0946156
						1.66	0.0463011		-100	0.0463011	0.335585		-100	-100	0.325862		-100	-100	0.0839844		-100	0.0839844
						1.67	0.0407117		-100	0.0407117	0.310208		-100	-100	0.302655		-100	-100	0.0743755		-100	0.0743755
						1.68	0.0357184		-100	0.0357184	0.286219		-100	-100	0.280634		-100	-100	0.0657136		-100	0.0657136
						1.69	0.0312687		-100	0.0312687	0.263597		-100	-100	0.259784		-100	-100	0.0579264		-100	0.0579264
						1.7	0.0273132		-100	0.0273132	0.242315		-100	0.242315	0.240084		-100	-100	0.0509438		-100	0.0509438
						1.71	0.0238056		-100	0.0238056	0.222339		-100	0.222339	0.22151		-100	0.22151	0.0446994		-100	0.0446994
						1.72	0.0207029		-100	0.0207029	0.203633		-100	0.203633	0.204033		-100	0.204033	0.0391298		-100	0.0391298
						1.73	0.0179651		-100	0.0179651	0.186156		-100	0.186156	0.187624		-100	0.187624	0.0341749		-100	0.0341749
						1.74	0.015555		-100	0.015555	0.169864		-100	0.169864	0.172249		-100	0.172249	0.0297785		-100	0.0297785
						1.75	0.0134387		-100	0.0134387	0.154712		-100	0.154712	0.157871		-100	0.157871	0.0258876		-100	0.0258876
						1.76	0.0115849		-100	0.0115849	0.14065		-100	0.14065	0.144453		-100	0.144453	0.0224532		-100	0.0224532
						1.77	0.00996477		-100	0.00996477	0.127631		-100	0.127631	0.131956		-100	0.131956	0.0194293		-100	0.0194293
						1.78	0.00855243		-100	0.00855243	0.115602		-100	0.115602	0.12034		-100	0.12034	0.0167738		-100	0.0167738
						1.79	0.00732413		-100	0.00732413	0.104514		-100	0.104514	0.109565		-100	0.109565	0.0144478		-100	0.0144478
						1.8	0.00625846		-100	0.00625846	0.0943143		-100	0.0943143	0.0995895		-100	0.0995895	0.0124155		-100	0.0124155
						1.81	0.00533611		-100	0.00533611	0.0849529		-100	0.0849529	0.0903718		-100	0.0903718	0.0106445		-100	0.0106445
						1.82	0.00453969		-100	0.00453969	0.0763791		-100	0.0763791	0.0818712		-100	0.0818712	0.00910497		-100	0.00910497
						1.83	0.00385365		-100	0.00385365	0.0685438		-100	0.0685438	0.0740472		-100	0.0740472	0.00777012		-100	0.00777012
						1.84	0.0032641		-100	0.0032641	0.0613985		-100	0.0613985	0.0668598		-100	0.0668598	0.00661563		-100	0.00661563
						1.85	0.00275867		-100	0.00275867	0.0548964		-100	0.0548964	0.0602699		-100	0.0602699	0.00561966		-100	0.00561966
						1.86	0.00232638		-100	0.00232638	0.0489921		-100	0.0489921	0.0542393		-100	0.0542393	0.00476259		-100	0.00476259
						1.87	0.00195753		-100	0.00195753	0.0436421		-100	0.0436421	0.0487313		-100	0.0487313	0.00402691		-100	0.00402691
						1.88	0.00164353		-100	0.00164353	0.0388044		-100	0.0388044	0.0437099		-100	0.0437099	0.003397		-100	0.003397
						1.89	0.00137687		-100	0.00137687	0.0344392		-100	0.0344392	0.0391409		-100	0.0391409	0.002859		-100	0.002859
						1.9	0.00115095		-100	0.00115095	0.0305085		-100	0.0305085	0.0349914		-100	0.0349914	0.00240064		-100	0.00240064
						1.91	0.000959978		-100	0.000959978	0.0269766		-100	0.0269766	0.0312299		-100	0.0312299	0.0020111		-100	0.0020111
						1.92	0.000798936		-100	0.000798936	0.0238094		-100	0.0238094	0.0278265		-100	0.0278265	0.00168088		-100	0.00168088
						1.93	0.000663449		-100	0.000663449	0.0209752		-100	0.0209752	0.0247528		-100	0.0247528	0.00140163		-100	0.00140163
						1.94	0.000549728		-100	0.000549728	0.0184442		-100	0.0184442	0.0219822		-100	0.0219822	0.00116608		-100	0.00116608
						1.95	0.0004545		-100	0.0004545	0.0161887		-100	0.0161887	0.0194893		-100	0.0194893	0.000967865		-100	0.000967865
						1.96	0.000374942		-100	0.000374942	0.0141827		-100	0.0141827	0.0172504		-100	0.0172504	0.000801488		-100	0.000801488
						1.97	0.000308631		-100	0.000308631	0.0124023		-100	0.0124023	0.0152434		-100	0.0152434	0.000662177		-100	0.000662177
						1.98	0.000253489		-100	0.000253489	0.0108254		-100	0.0108254	0.0134476		-100	0.0134476	0.000545816		-100	0.000545816
						1.99	0.000207742		-100	0.000207742	0.00943145		-100	0.00943145	0.0118436		-100	0.0118436	0.000448862		-100	0.000448862
						2	0.000169877		-100	0.000169877	0.00820185		-100	0.00820185	0.0104137		-100	0.0104137	0.000368277		-100	0.000368277
						2.01	0.000138608		-100	0.000138608	0.00711937		-100	0.00711937	0.0091412		-100	0.0091412	0.000301461		-100	0.000301461
						2.02	0.000112847		-100	0.000112847	0.00616833		-100	0.00616833	0.00801089		-100	0.00801089	0.000246197		-100	0.000246197
						2.03	9.16715e-05		-100	9.16715e-05	0.00533445		-100	0.00533445	0.0070087		-100	0.0070087	0.000200599		-100	0.000200599
						2.04	7.43061e-05		-100	7.43061e-05	0.00460478		-100	0.00460478	0.00612171		-100	0.00612171	0.000163069		-100	0.000163069
						2.05	6.00979e-05		-100	6.00979e-05	0.00396757		-100	0.00396757	0.00533811		-100	0.00533811	0.000132254		-100	0.000132254
						2.06	4.84996e-05		-100	4.84996e-05	0.00341221		-100	0.00341221	0.00464709		-100	0.00464709	0.000107013		-100	0.000107013
						2.07	3.90538e-05		-100	3.90538e-05	0.00292917		-100	0.00292917	0.00403881		-100	0.00403881	8.63901e-05		-100	8.63901e-05
						2.08	3.13785e-05		-100	3.13785e-05	0.00250986		-100	0.00250986	0.00350433		-100	0.00350433	6.95801e-05		-100	6.95801e-05
						2.09	2.51563e-05		-100	2.51563e-05	0.0021466		-100	0.0021466	0.00303553		-100	0.00303553	5.59114e-05		-100	5.59114e-05
						2.1	2.01236e-05		-100	2.01236e-05	0.00183252		-100	0.00183252	0.00262509		-100	0.00262509	4.48241e-05		-100	4.48241e-05
						2.11	1.60624e-05		-100	1.60624e-05	0.0015615		-100	0.0015615	0.00226638		-100	0.00226638	3.58523e-05		-100	3.58523e-05
						2.12	1.27926e-05		-100	1.27926e-05	0.00132811		-100	0.00132811	0.00195344		-100	0.00195344	2.86099e-05		-100	2.86099e-05
						2.13	1.01661e-05		-100	1.01661e-05	0.00112751		-100	0.00112751	0.00168092		-100	0.00168092	2.27778e-05		-100	2.27778e-05
						2.14	8.06106e-06		-100	8.06106e-06	0.000955442		-100	0.000955442	0.00144401		-100	0.00144401	1.80926e-05		-100	1.80926e-05
						2.15	6.37788e-06		-100	6.37788e-06	0.000808136		-100	0.000808136	0.00123844		-100	0.00123844	1.4338e-05		-100	1.4338e-05
						2.16	5.03506e-06		-100	5.03506e-06	0.000682277		-100	0.000682277	0.00106037		-100	0.00106037	1.13362e-05		-100	1.13362e-05
						2.17	3.96624e-06		-100	3.96624e-06	0.000574955		-100	0.000574955	0.000906402		-100	0.000906402	8.94214e-06		-100	8.94214e-06
						2.18	3.11743e-06		-100	3.11743e-06	0.000483619		-100	0.000483619	0.000773503		-100	0.000773503	7.03738e-06		-100	7.03738e-06
						2.19	2.4449e-06		-100	2.4449e-06	0.000406041		-100	0.000406041	0.000658995		-100	0.000658995	5.52555e-06		-100	5.52555e-06
						2.2	1.91324e-06		-100	1.91324e-06	0.000340276		-100	0.000340276	0.000560507		-100	0.000560507	4.32847e-06		-100	4.32847e-06
						2.21	1.4939e-06		-100	1.4939e-06	0.000284637		-100	0.000284637	0.000475947		-100	0.000475947	3.3829e-06		-100	3.3829e-06
						2.22	1.16391e-06		-100	1.16391e-06	0.000237655		-100	0.000237655	0.000403474		-100	0.000403474	2.63778e-06		-100	2.63778e-06
						2.23	9.04824e-07		-100	9.04824e-07	0.000198061		-100	0.000198061	0.000341469		-100	0.000341469	2.05202e-06		-100	2.05202e-06
						2.24	7.01863e-07		-100	7.01863e-07	0.000164758		-100	0.000164758	0.000288514		-100	0.000288514	1.59265e-06		-100	1.59265e-06
						2.25	5.43232e-07		-100	5.43232e-07	0.000136802		-100	0.000136802	0.000243366		-100	0.000243366	1.23326e-06		-100	1.23326e-06
						2.26	4.1953e-07		-100	4.1953e-07	0.000113379		-100	0.000113379	0.000204943		-100	0.000204943	9.52759e-07		-100	9.52759e-07
						2.27	3.23286e-07		-100	3.23286e-07	9.37929e-05		-100	9.37929e-05	0.0001723		-100	0.0001723	7.34356e-07		-100	7.34356e-07
						2.28	2.48573e-07		-100	2.48573e-07	7.74469e-05		-100	7.74469e-05	0.000144616		-100	0.000144616	5.64709e-07		-100	5.64709e-07
						2.29	1.90707e-07		-100	1.90707e-07	6.38315e-05		-100	6.38315e-05	0.000121178		-100	0.000121178	4.33249e-07		-100	4.33249e-07
						2.3	1.4599e-07		-100	1.4599e-07	5.25124e-05		-100	5.25124e-05	0.000101371		-100	0.000101371	3.31624e-07		-100	3.31624e-07
						2.31	1.11513e-07		-100	1.11513e-07	4.31207e-05		-100	4.31207e-05	8.46606e-05		-100	8.46606e-05	2.5325e-07		-100	2.5325e-07
						2.32	8.49913e-08		-100	8.49913e-08	3.53432e-05		-100	3.53432e-05	7.05875e-05		-100	7.05875e-05	1.92951e-07		-100	1.92951e-07
						2.33	6.46349e-08		-100	6.46349e-08	2.89149e-05		-100	2.89149e-05	5.87562e-05		-100	5.87562e-05	1.46669e-07		-100	1.46669e-07
						2.34	4.90461e-08		-100	4.90461e-08	2.36121e-05		-100	2.36121e-05	4.88267e-05		-100	4.88267e-05	1.11231e-07		-100	1.11231e-07
						2.35	3.71353e-08		-100	3.71353e-08	1.92462e-05		-100	1.92462e-05	4.0508e-05		-100	4.0508e-05	8.41607e-08		-100	8.41607e-08
						2.36	2.80552e-08		-100	2.80552e-08	1.56585e-05		-100	1.56585e-05	3.35509e-05		-100	3.35509e-05	6.35311e-08		-100	6.35311e-08
						2.37	2.11488e-08		-100	2.11488e-08	1.27161e-05		-100	1.27161e-05	2.77425e-05		-100	2.77425e-05	4.78474e-08		-100	4.78474e-08
						2.38	1.59075e-08		-100	1.59075e-08	1.03074e-05		-100	1.03074e-05	2.29016e-05		-100	2.29016e-05	3.59522e-08		-100	3.59522e-08
						2.39	1.19389e-08		-100	1.19389e-08	8.33962e-06		-100	8.33962e-06	1.8874e-05		-100	1.8874e-05	2.69518e-08		-100	2.69518e-08
						2.4	8.9407e-09		-100	8.9407e-09	6.73501e-06		-100	6.73501e-06	1.5529e-05		-100	1.5529e-05	2.01579e-08		-100	2.01579e-08
						2.41	6.68072e-09		-100	6.68072e-09	5.42908e-06		-100	5.42908e-06	1.27556e-05		-100	1.27556e-05	1.50417e-08		-100	1.50417e-08
						2.42	4.98104e-09		-100	4.98104e-09	4.36829e-06		-100	4.36829e-06	1.04601e-05		-100	1.04601e-05	1.11981e-08		-100	1.11981e-08
						2.43	3.70562e-09		-100	3.70562e-09	3.50826e-06		-100	3.50826e-06	8.5635e-06		-100	8.5635e-06	8.31733e-09		-100	8.31733e-09
						2.44	2.75073e-09		-100	2.75073e-09	2.81235e-06		-100	2.81235e-06	6.99915e-06		-100	6.99915e-06	6.1634e-09		-100	6.1634e-09
						2.45	2.03741e-09		-100	2.03741e-09	2.25032e-06		-100	2.25032e-06	5.71108e-06		-100	5.71108e-06	4.55671e-09		-100	4.55671e-09
						2.46	1.50576e-09		-100	1.50576e-09	1.79727e-06		-100	1.79727e-06	4.65233e-06		-100	4.65233e-06	3.36107e-09		-100	3.36107e-09
						2.47	1.11039e-09		-100	1.11039e-09	1.43279e-06		-100	1.43279e-06	3.78357e-06		-100	3.78357e-06	2.47342e-09		-100	2.47342e-09
						2.48	8.1704e-10		-100	8.1704e-10	1.1401e-06		-100	1.1401e-06	3.07193e-06		-100	3.07193e-06	1.81599e-09		-100	1.81599e-09
						2.49	5.99866e-10		-100	5.99866e-10	9.05534e-07		-100	9.05534e-07	2.49001e-06		-100	2.49001e-06	1.33022e-09		-100	1.33022e-09
						2.5	4.39451e-10		-100	4.39451e-10	7.17895e-07		-100	7.17895e-07	2.01497e-06		-100	2.01497e-06	9.72144e-10		-100	9.72144e-10
						2.51	3.21226e-10		-100	3.21226e-10	5.68086e-07		-100	5.68086e-07	1.62785e-06		-100	1.62785e-06	7.08812e-10		-100	7.08812e-10
						2.52	2.34292e-10		-100	2.34292e-10	4.48707e-07		-100	4.48707e-07	1.31293e-06		-100	1.31293e-06	5.15616e-10		-100	5.15616e-10
						2.53	1.70509e-10		-100	1.70509e-10	3.5376e-07		-100	3.5376e-07	1.05717e-06		-100	1.05717e-06	3.74211e-10		-100	3.74211e-10
						2.54	1.23818e-10		-100	1.23818e-10	2.78389e-07		-100	2.78389e-07	8.49825e-07		-100	8.49825e-07	2.70958e-10		-100	2.70958e-10
						2.55	8.97148e-11		-100	8.97148e-11	2.1867e-07		-100	2.1867e-07	6.82013e-07		-100	6.82013e-07	1.95741e-10		-100	1.95741e-10
						2.56	6.48619e-11		-100	6.48619e-11	1.71445e-07		-100	1.71445e-07	5.46429e-07		-100	5.46429e-07	1.41077e-10		-100	1.41077e-10
						2.57	4.67908e-11		-100	4.67908e-11	1.3417e-07		-100	1.3417e-07	4.37074e-07		-100	4.37074e-07	1.01444e-10		-100	1.01444e-10
						2.58	3.36803e-11		-100	3.36803e-11	1.04806e-07		-100	1.04806e-07	3.49023e-07		-100	3.49023e-07	7.27763e-11		-100	7.27763e-11
						2.59	2.419e-11		-100	2.419e-11	8.17165e-08		-100	8.17165e-08	2.78249e-07		-100	2.78249e-07	5.20894e-11		-100	5.20894e-11
						2.6	1.73357e-11		-100	1.73357e-11	6.35961e-08		-100	6.35961e-08	2.21457e-07		-100	2.21457e-07	3.71967e-11		-100	3.71967e-11
						2.61	1.23963e-11		-100	1.23963e-11	4.94024e-08		-100	4.94024e-08	1.75965e-07		-100	1.75965e-07	2.65004e-11		-100	2.65004e-11
						2.62	8.84476e-12		-100	8.84476e-12	3.83056e-08		-100	3.83056e-08	1.39586e-07		-100	1.39586e-07	1.88364e-11		-100	1.88364e-11
						2.63	6.29689e-12		-100	6.29689e-12	2.96464e-08		-100	2.96464e-08	1.10544e-07		-100	1.10544e-07	1.33578e-11		-100	1.33578e-11
						2.64	4.47313e-12		-100	4.47313e-12	2.29023e-08		-100	2.29023e-08	8.73997e-08		-100	8.73997e-08	9.45083e-12		-100	9.45083e-12
						2.65	3.1706e-12		-100	3.1706e-12	1.76597e-08		-100	1.76597e-08	6.89862e-08		-100	6.89862e-08	6.67112e-12		-100	6.67112e-12
						2.66	2.24241e-12		-100	2.24241e-12	1.3592e-08		-100	1.3592e-08	5.43618e-08		-100	5.43618e-08	4.6981e-12		-100	4.6981e-12
						2.67	1.58247e-12		-100	1.58247e-12	1.04419e-08		-100	1.04419e-08	4.27665e-08		-100	4.27665e-08	3.30096e-12		-100	3.30096e-12
						2.68	1.11429e-12		-100	1.11429e-12	8.00703e-09		-100	8.00703e-09	3.35887e-08		-100	3.35887e-08	2.31395e-12		-100	2.31395e-12
						2.69	7.82905e-13		-100	7.82905e-13	6.12859e-09		-100	6.12859e-09	2.63367e-08		-100	2.63367e-08	1.61831e-12		-100	1.61831e-12
						2.7	5.48863e-13		-100	5.48863e-13	4.68216e-09		-100	4.68216e-09	2.06162e-08		-100	2.06162e-08	1.12918e-12		-100	1.12918e-12
						2.71	3.8394e-13		-100	3.8394e-13	3.5705e-09		-100	3.5705e-09	1.61115e-08		-100	1.61115e-08	7.86073e-13		-100	7.86073e-13
						2.72	2.67983e-13		-100	2.67983e-13	2.71774e-09		-100	2.71774e-09	1.25701e-08		-100	1.25701e-08	5.45954e-13		-100	5.45954e-13
						2.73	1.86636e-13		-100	1.86636e-13	2.06482e-09		-100	2.06482e-09	9.79093e-09		-100	9.79093e-09	3.78306e-13		-100	3.78306e-13
						2.74	1.29697e-13		-100	1.29697e-13	1.56586e-09		-100	1.56586e-09	7.61355e-09		-100	7.61355e-09	2.61533e-13		-100	2.61533e-13
						2.75	8.9931e-14		-100	8.9931e-14	1.18528e-09		-100	1.18528e-09	5.91057e-09		-100	5.91057e-09	1.80386e-13		-100	1.80386e-13
						2.76	6.22205e-14		-100	6.22205e-14	8.95543e-10		-100	8.95543e-10	4.58089e-09		-100	4.58089e-09	1.2413e-13		-100	1.2413e-13
						2.77	4.29539e-14		-100	4.29539e-14	6.75379e-10		-100	6.75379e-10	3.54446e-09		-100	3.54446e-09	8.52202e-14		-100	8.52202e-14
						2.78	2.9588e-14		-100	2.9588e-14	5.08399e-10		-100	5.08399e-10	2.73797e-09		-100	2.73797e-09	5.8372e-14		-100	5.8372e-14
						2.79	2.03364e-14		-100	2.03364e-14	3.81996e-10		-100	3.81996e-10	2.11148e-09		-100	2.11148e-09	3.98898e-14		-100	3.98898e-14
						2.8	1.39469e-14		-100	1.39469e-14	2.8649e-10		-100	2.8649e-10	1.62564e-09		-100	1.62564e-09	2.71965e-14		-100	2.71965e-14
						2.81	9.54392e-15		-100	9.54392e-15	2.14465e-10		-100	2.14465e-10	1.24951e-09		-100	1.24951e-09	1.84995e-14		-100	1.84995e-14
						2.82	6.51659e-15		-100	6.51659e-15	1.6025e-10		-100	1.6025e-10	9.58813e-10		-100	9.58813e-10	1.25546e-14		-100	1.25546e-14
						2.83	4.43975e-15		-100	4.43975e-15	1.1952e-10		-100	1.1952e-10	7.34527e-10		-100	7.34527e-10	8.50037e-15		-100	8.50037e-15
						2.84	3.01816e-15		-100	3.01816e-15	8.89764e-11		-100	8.89764e-11	5.61772e-10		-100	5.61772e-10	5.74208e-15		-100	5.74208e-15
						2.85	2.04725e-15		-100	2.04725e-15	6.61162e-11		-100	6.61162e-11	4.28935e-10		-100	4.28935e-10	3.86986e-15		-100	3.86986e-15
						2.86	1.38562e-15		-100	1.38562e-15	4.90385e-11		-100	4.90385e-11	3.26966e-10		-100	3.26966e-10	2.60206e-15		-100	2.60206e-15
						2.87	9.35753e-16		-100	9.35753e-16	3.63047e-11		-100	3.63047e-11	2.48824e-10		-100	2.48824e-10	1.74555e-15		-100	1.74555e-15
						2.88	6.30557e-16		-100	6.30557e-16	2.68278e-11		-100	2.68278e-11	1.89043e-10		-100	1.89043e-10	1.16827e-15		-100	1.16827e-15
						2.89	4.23967e-16		-100	4.23967e-16	1.9788e-11		-100	1.9788e-11	1.43386e-10		-100	1.43386e-10	7.80097e-16		-100	7.80097e-16
						2.9	2.84436e-16		-100	2.84436e-16	1.45686e-11		-100	1.45686e-11	1.08576e-10		-100	1.08576e-10	5.19696e-16		-100	5.19696e-16
						2.91	1.90407e-16		-100	1.90407e-16	1.07061e-11		-100	1.07061e-11	8.20805e-11		-100	8.20805e-11	3.45418e-16		-100	3.45418e-16
						2.92	1.27182e-16		-100	1.27182e-16	7.85303e-12		-100	7.85303e-12	6.19476e-11		-100	6.19476e-11	2.29053e-16		-100	2.29053e-16
						2.93	8.47642e-17		-100	8.47642e-17	5.74965e-12		-100	5.74965e-12	4.66754e-11		-100	4.66754e-11	1.51538e-16		-100	1.51538e-16
						2.94	5.63696e-17		-100	5.63696e-17	4.20187e-12		-100	4.20187e-12	3.51099e-11		-100	3.51099e-11	1.00023e-16		-100	1.00023e-16
						2.95	3.74044e-17		-100	3.74044e-17	3.06507e-12		-100	3.06507e-12	2.63664e-11		-100	2.63664e-11	6.58681e-17		-100	6.58681e-17
						2.96	2.47654e-17		-100	2.47654e-17	2.23169e-12		-100	2.23169e-12	1.97675e-11		-100	1.97675e-11	4.32758e-17		-100	4.32758e-17
						2.97	1.63611e-17		-100	1.63611e-17	1.6219e-12		-100	1.6219e-12	1.47955e-11		-100	1.47955e-11	2.83668e-17		-100	2.83668e-17
						2.98	1.07851e-17		-100	1.07851e-17	1.17655e-12		-100	1.17655e-12	1.10558e-11		-100	1.10558e-11	1.85511e-17		-100	1.85511e-17
						2.99	7.09383e-18		-100	7.09383e-18	8.5191e-13		-100	8.5191e-13	8.24757e-12		-100	8.24757e-12	1.21039e-17		-100	1.21039e-17
						3	4.65568e-18		-100	4.65568e-18	6.15706e-13		-100	6.15706e-13	6.14246e-12		-100	6.14246e-12	7.87903e-18		-100	7.87903e-18
						3.01	3.04881e-18		-100	3.04881e-18	4.4417e-13		-100	4.4417e-13	4.56706e-12		-100	4.56706e-12	5.11702e-18		-100	5.11702e-18
						3.02	1.99215e-18		-100	1.99215e-18	3.19832e-13		-100	3.19832e-13	3.39009e-12		-100	3.39009e-12	3.31555e-18		-100	3.31555e-18
						3.03	1.29885e-18		-100	1.29885e-18	2.29875e-13		-100	2.29875e-13	2.51226e-12		-100	2.51226e-12	2.14333e-18		-100	2.14333e-18
						3.04	8.44968e-19		-100	8.44968e-19	1.64914e-13		-100	1.64914e-13	1.85864e-12		-100	1.85864e-12	1.38235e-18		-100	1.38235e-18
						3.05	5.48487e-19		-100	5.48487e-19	1.18092e-13		-100	1.18092e-13	1.3728e-12		-100	1.3728e-12	8.89493e-19		-100	8.89493e-19
						3.06	3.55253e-19		-100	3.55253e-19	8.44067e-14		-100	8.44067e-14	1.01227e-12		-100	1.01227e-12	5.71033e-19		-100	5.71033e-19
						3.07	2.29591e-19		-100	2.29591e-19	6.02188e-14		-100	6.02188e-14	7.45188e-13		-100	7.45188e-13	3.65742e-19		-100	3.65742e-19
						3.08	1.48053e-19		-100	1.48053e-19	4.28828e-14		-100	4.28828e-14	5.47663e-13		-100	5.47663e-13	2.33713e-19		-100	2.33713e-19
						3.09	9.52625e-20		-100	9.52625e-20	3.04811e-14		-100	3.04811e-14	4.01828e-13		-100	4.01828e-13	1.49e-19		-100	1.49e-19
						3.1	6.11608e-20		-100	6.11608e-20	2.1626e-14		-100	2.1626e-14	2.94338e-13		-100	2.94338e-13	9.47728e-20		-100	9.47728e-20
						3.11	3.91804e-20		-100	3.91804e-20	1.5315e-14		-100	1.5315e-14	2.15244e-13		-100	2.15244e-13	6.01418e-20		-100	6.01418e-20
						3.12	2.50444e-20		-100	2.50444e-20	1.08256e-14		-100	1.08256e-14	1.57143e-13		-100	1.57143e-13	3.80772e-20		-100	3.80772e-20
						3.13	1.59734e-20		-100	1.59734e-20	7.63813e-15		-100	7.63813e-15	1.14535e-13		-100	1.14535e-13	2.40518e-20		-100	2.40518e-20
						3.14	1.01655e-20		-100	1.01655e-20	5.3792e-15		-100	5.3792e-15	8.3341e-14		-100	8.3341e-14	1.51574e-20		-100	1.51574e-20
						3.15	6.4551e-21		-100	6.4551e-21	3.78132e-15		-100	3.78132e-15	6.05423e-14		-100	6.05423e-14	9.53009e-21		-100	9.53009e-21
						3.16	4.09e-21		-100	4.09e-21	2.65318e-15		-100	2.65318e-15	4.39075e-14		-100	4.39075e-14	5.97812e-21		-100	5.97812e-21
						3.17	2.58577e-21		-100	2.58577e-21	1.85817e-15		-100	1.85817e-15	3.17905e-14		-100	3.17905e-14	3.74133e-21		-100	3.74133e-21
						3.18	1.63117e-21		-100	1.63117e-21	1.29898e-15		-100	1.29898e-15	2.29792e-14		-100	2.29792e-14	2.33606e-21		-100	2.33606e-21
						3.19	1.02673e-21		-100	1.02673e-21	9.0639e-16		-100	9.0639e-16	1.65825e-14		-100	1.65825e-14	1.45524e-21		-100	1.45524e-21
						3.2	6.44845e-22		-100	6.44845e-22	6.31283e-16		-100	6.31283e-16	1.19467e-14		-100	1.19467e-14	9.04445e-22		-100	9.04445e-22
						3.21	4.04111e-22		-100	4.04111e-22	4.38864e-16		-100	4.38864e-16	8.59252e-15		-100	8.59252e-15	5.6082e-22		-100	5.6082e-22
						3.22	2.52692e-22		-100	2.52692e-22	3.04531e-16		-100	3.04531e-16	6.16984e-15		-100	6.16984e-15	3.46945e-22		-100	3.46945e-22
						3.23	1.57662e-22		-100	1.57662e-22	2.10926e-16		-100	2.10926e-16	4.42289e-15		-100	4.42289e-15	2.14137e-22		-100	2.14137e-22
						3.24	9.81535e-23		-100	9.81535e-23	1.45822e-16		-100	1.45822e-16	3.16532e-15		-100	3.16532e-15	1.31862e-22		-100	1.31862e-22
						3.25	6.09721e-23		-100	6.09721e-23	1.00627e-16		-100	1.00627e-16	2.26156e-15		-100	2.26156e-15	8.10101e-23		-100	8.10101e-23
						3.26	3.77921e-23		-100	3.77921e-23	6.93112e-17		-100	6.93112e-17	1.61316e-15		-100	1.61316e-15	4.96541e-23		-100	4.96541e-23
						3.27	2.33731e-23		-100	2.33731e-23	4.76527e-17		-100	4.76527e-17	1.14875e-15		-100	1.14875e-15	3.03645e-23		-100	3.03645e-23
						3.28	1.44237e-23		-100	1.44237e-23	3.27016e-17		-100	3.27016e-17	8.1668e-16		-100	8.1668e-16	1.85256e-23		-100	1.85256e-23
						3.29	8.88137e-24		-100	8.88137e-24	2.23999e-17		-100	2.23999e-17	5.79639e-16		-100	5.79639e-16	1.12765e-23		-100	1.12765e-23
						3.3	5.45669e-24		-100	5.45669e-24	1.53151e-17		-100	1.53151e-17	4.10717e-16		-100	4.10717e-16	6.84807e-24		-100	6.84807e-24
						3.31	3.34521e-24		-100	3.34521e-24	1.04518e-17		-100	1.04518e-17	2.90541e-16		-100	2.90541e-16	4.14914e-24		-100	4.14914e-24
						3.32	2.04627e-24		-100	2.04627e-24	7.1196e-18		-100	7.1196e-18	2.05187e-16		-100	2.05187e-16	2.50809e-24		-100	2.50809e-24
						3.33	1.24896e-24		-100	1.24896e-24	4.84082e-18		-100	4.84082e-18	1.44668e-16		-100	1.44668e-16	1.5126e-24		-100	1.5126e-24
						3.34	7.60636e-25		-100	7.60636e-25	3.28532e-18		-100	3.28532e-18	1.01829e-16		-100	1.01829e-16	9.10121e-25		-100	9.10121e-25
						3.35	4.62222e-25		-100	4.62222e-25	2.22553e-18		-100	2.22553e-18	7.1557e-17		-100	7.1557e-17	5.46347e-25		-100	5.46347e-25
						3.36	2.80266e-25		-100	2.80266e-25	1.50483e-18		-100	1.50483e-18	5.02009e-17		-100	5.02009e-17	3.27215e-25		-100	3.27215e-25
						3.37	1.69564e-25		-100	1.69564e-25	1.01563e-18		-100	1.01563e-18	3.516e-17		-100	3.516e-17	1.95521e-25		-100	1.95521e-25
						3.38	1.02363e-25		-100	1.02363e-25	6.84196e-19		-100	6.84196e-19	2.45847e-17		-100	2.45847e-17	1.1656e-25		-100	1.1656e-25
						3.39	6.1659e-26		-100	6.1659e-26	4.60068e-19		-100	4.60068e-19	1.71617e-17		-100	1.71617e-17	6.93262e-26		-100	6.93262e-26
						3.4	3.70591e-26		-100	3.70591e-26	3.08788e-19		-100	3.08788e-19	1.19601e-17		-100	1.19601e-17	4.11378e-26		-100	4.11378e-26
						3.41	2.22249e-26		-100	2.22249e-26	2.06869e-19		-100	2.06869e-19	8.32127e-18		-100	8.32127e-18	2.43546e-26		-100	2.43546e-26
						3.42	1.32993e-26		-100	1.32993e-26	1.38333e-19		-100	1.38333e-19	5.77992e-18		-100	5.77992e-18	1.43852e-26		-100	1.43852e-26
						3.43	7.94074e-27		-100	7.94074e-27	9.23324e-20		-100	9.23324e-20	4.00805e-18		-100	4.00805e-18	8.47703e-27		-100	8.47703e-27
						3.44	4.73085e-27		-100	4.73085e-27	6.15146e-20		-100	6.15146e-20	2.77475e-18		-100	2.77475e-18	4.98388e-27		-100	4.98388e-27
						3.45	2.81231e-27		-100	2.81231e-27	4.09071e-20		-100	4.09071e-20	1.91776e-18		-100	1.91776e-18	2.92338e-27		-100	2.92338e-27
						3.46	1.66813e-27		-100	1.66813e-27	2.71529e-20		-100	2.71529e-20	1.32325e-18		-100	1.32325e-18	1.7108e-27		-100	1.7108e-27
						3.47	9.87288e-28		-100	9.87288e-28	1.79899e-20		-100	1.79899e-20	9.11527e-19		-100	9.11527e-19	9.98868e-28		-100	9.98868e-28
						3.48	5.83045e-28		-100	5.83045e-28	1.18971e-20		-100	1.18971e-20	6.26867e-19		-100	6.26867e-19	5.8185e-28		-100	5.8185e-28
						3.49	3.43562e-28		-100	3.43562e-28	7.85319e-21		-100	7.85319e-21	4.30389e-19		-100	4.30389e-19	3.3815e-28		-100	3.3815e-28
						3.5	2.02001e-28		-100	2.02001e-28	5.17427e-21		-100	5.17427e-21	2.95002e-19		-100	2.95002e-19	1.96066e-28		-100	1.96066e-28
						3.51	1.18507e-28		-100	1.18507e-28	3.40289e-21		-100	3.40289e-21	2.01869e-19		-100	2.01869e-19	1.1342e-28		-100	1.1342e-28
						3.52	6.93719e-29		-100	6.93719e-29	2.2338e-21		-100	2.2338e-21	1.37908e-19		-100	1.37908e-19	6.54596e-29		-100	6.54596e-29
						3.53	4.05197e-29		-100	4.05197e-29	1.46365e-21		-100	1.46365e-21	9.40572e-20		-100	9.40572e-20	3.76921e-29		-100	3.76921e-29
						3.54	2.36153e-29		-100	2.36153e-29	9.57249e-22		-100	9.57249e-22	6.40431e-20		-100	6.40431e-20	2.16533e-29		-100	2.16533e-29
						3.55	1.3733e-29		-100	1.3733e-29	6.249e-22		-100	6.249e-22	4.35343e-20		-100	4.35343e-20	1.24105e-29		-100	1.24105e-29
						3.56	7.96863e-30		-100	7.96863e-30	4.07185e-22		-100	4.07185e-22	2.9544e-20		-100	2.9544e-20	7.09664e-30		-100	7.09664e-30
						3.57	4.61367e-30		-100	4.61367e-30	2.64832e-22		-100	2.64832e-22	2.00164e-20		-100	2.00164e-20	4.04865e-30		-100	4.04865e-30
						3.58	2.66534e-30		-100	2.66534e-30	1.71927e-22		-100	1.71927e-22	1.35389e-20		-100	1.35389e-20	2.30442e-30		-100	2.30442e-30
						3.59	1.5364e-30		-100	1.5364e-30	1.11408e-22		-100	1.11408e-22	9.14234e-21		-100	9.14234e-21	1.30861e-30		-100	1.30861e-30
						3.6	8.83696e-31		-100	8.83696e-31	7.20582e-23		-100	7.20582e-23	6.16327e-21		-100	6.16327e-21	7.41397e-31		-100	7.41397e-31
						3.61	5.0716e-31		-100	5.0716e-31	4.65208e-23		-100	4.65208e-23	4.14805e-21		-100	4.14805e-21	4.19071e-31		-100	4.19071e-31
						3.62	2.90423e-31		-100	2.90423e-31	2.99784e-23		-100	2.99784e-23	2.78712e-21		-100	2.78712e-21	2.3633e-31		-100	2.3633e-31
						3.63	1.65945e-31		-100	1.65945e-31	1.92826e-23		-100	1.92826e-23	1.86959e-21		-100	1.86959e-21	1.32967e-31		-100	1.32967e-31
						3.64	9.46107e-32		-100	9.46107e-32	1.23799e-23		-100	1.23799e-23	1.25203e-21		-100	1.25203e-21	7.46391e-32		-100	7.46391e-32
						3.65	5.38223e-32		-100	5.38223e-32	7.93356e-24		-100	7.93356e-24	8.37077e-22		-100	8.37077e-22	4.18006e-32		-100	4.18006e-32
						3.66	3.05512e-32		-100	3.05512e-32	5.07475e-24		-100	5.07475e-24	5.58718e-22		-100	5.58718e-22	2.33557e-32		-100	2.33557e-32
						3.67	1.73037e-32		-100	1.73037e-32	3.24009e-24		-100	3.24009e-24	3.72306e-22		-100	3.72306e-22	1.30197e-32		-100	1.30197e-32
						3.68	9.77905e-33		-100	9.77905e-33	2.06489e-24		-100	2.06489e-24	2.47677e-22		-100	2.47677e-22	7.24103e-33		-100	7.24103e-33
						3.69	5.5144e-33		-100	5.5144e-33	1.31351e-24		-100	1.31351e-24	1.64494e-22		-100	1.64494e-22	4.01787e-33		-100	4.01787e-33
						3.7	3.10273e-33		-100	3.10273e-33	8.33997e-25		-100	8.33997e-25	1.09067e-22		-100	1.09067e-22	2.22427e-33		-100	2.22427e-33
						3.71	1.74195e-33		-100	1.74195e-33	5.28559e-25		-100	5.28559e-25	7.21965e-23		-100	7.21965e-23	1.22849e-33		-100	1.22849e-33
						3.72	9.75824e-34		-100	9.75824e-34	3.34363e-25		-100	3.34363e-25	4.77109e-23		-100	4.77109e-23	6.76943e-34		-100	6.76943e-34
						3.73	5.45447e-34		-100	5.45447e-34	2.11125e-25		-100	2.11125e-25	3.14773e-23		-100	3.14773e-23	3.72158e-34		-100	3.72158e-34
						3.74	3.04214e-34		-100	3.04214e-34	1.33063e-25		-100	1.33063e-25	2.07328e-23		-100	2.07328e-23	2.04126e-34		-100	2.04126e-34
						3.75	1.69297e-34		-100	1.69297e-34	8.37091e-26		-100	8.37091e-26	1.36331e-23		-100	1.36331e-23	1.11702e-34		-100	1.11702e-34
						3.76	9.40081e-35		-100	9.40081e-35	5.25634e-26		-100	5.25634e-26	8.94979e-24		-100	8.94979e-24	6.09849e-35		-100	6.09849e-35
						3.77	5.20866e-35		-100	5.20866e-35	3.29451e-26		-100	3.29451e-26	5.86556e-24		-100	5.86556e-24	3.32182e-35		-100	3.32182e-35
						3.78	2.8796e-35		-100	2.8796e-35	2.06108e-26		-100	2.06108e-26	3.83782e-24		-100	3.83782e-24	1.8052e-35		-100	1.8052e-35
						3.79	1.58848e-35		-100	1.58848e-35	1.28705e-26		-100	1.28705e-26	2.50691e-24		-100	2.50691e-24	9.78747e-36		-100	9.78747e-36
						3.8	8.74335e-36		-100	8.74335e-36	8.02218e-27		-100	8.02218e-27	1.63483e-24		-100	1.63483e-24	5.29432e-36		-100	5.29432e-36
						3.81	4.80195e-36		-100	4.80195e-36	4.99098e-27		-100	4.99098e-27	1.06435e-24		-100	1.06435e-24	2.85722e-36		-100	2.85722e-36
						3.82	2.6315e-36		-100	2.6315e-36	3.09938e-27		-100	3.09938e-27	6.91792e-25		-100	6.91792e-25	1.53841e-36		-100	1.53841e-36
						3.83	1.43891e-36		-100	1.43891e-36	1.92115e-27		-100	1.92115e-27	4.48896e-25		-100	4.48896e-25	8.26413e-37		-100	8.26413e-37
						3.84	7.85071e-37		-100	7.85071e-37	1.18862e-27		-100	1.18862e-27	2.908e-25		-100	2.908e-25	4.4291e-37		-100	4.4291e-37
						3.85	4.27394e-37		-100	4.27394e-37	7.34047e-28		-100	7.34047e-28	1.88071e-25		-100	1.88071e-25	2.36826e-37		-100	2.36826e-37
						3.86	2.32163e-37		-100	2.32163e-37	4.5248e-28		-100	4.5248e-28	1.21431e-25		-100	1.21431e-25	1.26339e-37		-100	1.26339e-37
						3.87	1.25836e-37		-100	1.25836e-37	2.78401e-28		-100	2.78401e-28	7.82736e-26		-100	7.82736e-26	6.72421e-38		-100	6.72421e-38
						3.88	6.80548e-38		-100	6.80548e-38	1.70978e-28		-100	1.70978e-28	5.0371e-26		-100	5.0371e-26	3.57059e-38		-100	3.57059e-38
						3.89	3.67247e-38		-100	3.67247e-38	1.04811e-28		-100	1.04811e-28	3.23612e-26		-100	3.23612e-26	1.89161e-38		-100	1.89161e-38
						3.9	1.97744e-38		-100	1.97744e-38	6.41308e-29		-100	6.41308e-29	2.07562e-26		-100	2.07562e-26	9.99817e-39		-100	9.99817e-39
						3.91	1.06241e-38		-100	1.06241e-38	3.91674e-29		-100	3.91674e-29	1.32907e-26		-100	1.32907e-26	5.27234e-39		-100	5.27234e-39
						3.92	5.69544e-39		-100	5.69544e-39	2.3877e-29		-100	2.3877e-29	8.49629e-27		-100	8.49629e-27	2.77384e-39		-100	2.77384e-39
						3.93	3.04654e-39		-100	3.04654e-39	1.45288e-29		-100	1.45288e-29	5.42237e-27		-100	5.42237e-27	1.45598e-39		-100	1.45598e-39
						3.94	1.62604e-39		-100	1.62604e-39	8.82424e-30		-100	8.82424e-30	3.45484e-27		-100	3.45484e-27	7.62468e-40		-100	7.62468e-40
						3.95	8.65965e-40		-100	8.65965e-40	5.3496e-30		-100	5.3496e-30	2.19758e-27		-100	2.19758e-27	3.98367e-40		-100	3.98367e-40
						3.96	4.60166e-40		-100	4.60166e-40	3.23714e-30		-100	3.23714e-30	1.39554e-27		-100	1.39554e-27	2.07654e-40		-100	2.07654e-40
						3.97	2.43991e-40		-100	2.43991e-40	1.95523e-30		-100	1.95523e-30	8.84744e-28		-100	8.84744e-28	1.07992e-40		-100	1.07992e-40
						3.98	1.29085e-40		-100	1.29085e-40	1.17878e-30		-100	1.17878e-30	5.5998e-28		-100	5.5998e-28	5.60325e-41		-100	5.60325e-41
						3.99	6.81438e-41		-100	6.81438e-41	7.09351e-31		-100	7.09351e-31	3.53839e-28		-100	3.53839e-28	2.90056e-41		-100	2.90056e-41
						4	3.58939e-41		-100	3.58939e-41	4.26076e-31		-100	4.26076e-31	2.23212e-28		-100	2.23212e-28	1.49802e-41		-100	1.49802e-41
						4.01	1.88651e-41		-100	1.88651e-41	2.55452e-31		-100	2.55452e-31	1.40576e-28		-100	1.40576e-28	7.71881e-42		-100	7.71881e-42
						4.02	9.89333e-42		-100	9.89333e-42	1.52872e-31		-100	1.52872e-31	8.83853e-29		-100	8.83853e-29	3.96805e-42		-100	3.96805e-42
						4.03	5.17692e-42		-100	5.17692e-42	9.13155e-32		-100	9.13155e-32	5.54791e-29		-100	5.54791e-29	2.03516e-42		-100	2.03516e-42
						4.04	2.70299e-42		-100	2.70299e-42	5.44448e-32		-100	5.44448e-32	3.47662e-29		-100	3.47662e-29	1.04139e-42		-100	1.04139e-42
						4.05	1.4082e-42		-100	1.4082e-42	3.24015e-32		-100	3.24015e-32	2.17503e-29		-100	2.17503e-29	5.3165e-43		-100	5.3165e-43
						4.06	7.32026e-43		-100	7.32026e-43	1.92473e-32		-100	1.92473e-32	1.35847e-29		-100	1.35847e-29	2.7079e-43		-100	2.7079e-43
						4.07	3.79695e-43		-100	3.79695e-43	1.14123e-32		-100	1.14123e-32	8.47065e-30		-100	8.47065e-30	1.37605e-43		-100	1.37605e-43
						4.08	1.96512e-43		-100	1.96512e-43	6.75413e-33		-100	6.75413e-33	5.27304e-30		-100	5.27304e-30	6.97635e-44		-100	6.97635e-44
						4.09	1.01481e-43		-100	1.01481e-43	3.98992e-33		-100	3.98992e-33	3.27706e-30		-100	3.27706e-30	3.52874e-44		-100	3.52874e-44
						4.1	5.22913e-44		-100	5.22913e-44	2.35263e-33		-100	2.35263e-33	2.03323e-30		-100	2.03323e-30	1.78076e-44		-100	1.78076e-44
						4.11	2.68854e-44		-100	2.68854e-44	1.38466e-33		-100	1.38466e-33	1.25941e-30		-100	1.25941e-30	8.96572e-45		-100	8.96572e-45
						4.12	1.37927e-44		-100	1.37927e-44	8.1344e-34		-100	8.1344e-34	7.78802e-31		-100	7.78802e-31	4.50361e-45		-100	4.50361e-45
						4.13	7.06038e-45		-100	7.06038e-45	4.76986e-34		-100	4.76986e-34	4.80802e-31		-100	4.80802e-31	2.25699e-45		-100	2.25699e-45
						4.14	3.60621e-45		-100	3.60621e-45	2.79179e-34		-100	2.79179e-34	2.96336e-31		-100	2.96336e-31	1.12848e-45		-100	1.12848e-45
						4.15	1.83788e-45		-100	1.83788e-45	1.63101e-34		-100	1.63101e-34	1.8234e-31		-100	1.8234e-31	5.62931e-46		-100	5.62931e-46
						4.16	9.34611e-46		-100	9.34611e-46	9.51098e-35		-100	9.51098e-35	1.1201e-31		-100	1.1201e-31	2.80163e-46		-100	2.80163e-46
						4.17	4.74229e-46		-100	4.74229e-46	5.53594e-35		-100	5.53594e-35	6.86929e-32		-100	6.86929e-32	1.3911e-46		-100	1.3911e-46
						4.18	2.40099e-46		-100	2.40099e-46	3.21628e-35		-100	3.21628e-35	4.20577e-32		-100	4.20577e-32	6.89135e-47		-100	6.89135e-47
						4.19	1.21294e-46		-100	1.21294e-46	1.86515e-35		-100	1.86515e-35	2.57074e-32		-100	2.57074e-32	3.40599e-47		-100	3.40599e-47
						4.2	6.11407e-47		-100	6.11407e-47	1.07961e-35		-100	1.07961e-35	1.56874e-32		-100	1.56874e-32	1.67949e-47		-100	1.67949e-47
						4.21	3.07516e-47		-100	3.07516e-47	6.23764e-36		-100	6.23764e-36	9.55698e-33		-100	9.55698e-33	8.26242e-48		-100	8.26242e-48
						4.22	1.5433e-47		-100	1.5433e-47	3.59723e-36		-100	3.59723e-36	5.8126e-33		-100	5.8126e-33	4.05538e-48		-100	4.05538e-48
						4.23	7.72817e-48		-100	7.72817e-48	2.07068e-36		-100	2.07068e-36	3.52939e-33		-100	3.52939e-33	1.98587e-48		-100	1.98587e-48
						4.24	3.86143e-48		-100	3.86143e-48	1.18975e-36		-100	1.18975e-36	2.13947e-33		-100	2.13947e-33	9.70206e-49		-100	9.70206e-49
						4.25	1.92515e-48		-100	1.92515e-48	6.82327e-37		-100	6.82327e-37	1.29477e-33		-100	1.29477e-33	4.72903e-49		-100	4.72903e-49
						4.26	9.57695e-49		-100	9.57695e-49	3.90595e-37		-100	3.90595e-37	7.82274e-34		-100	7.82274e-34	2.29972e-49		-100	2.29972e-49
						4.27	4.75372e-49		-100	4.75372e-49	2.23181e-37		-100	2.23181e-37	4.71849e-34		-100	4.71849e-34	1.11577e-49		-100	1.11577e-49
						4.28	2.35443e-49		-100	2.35443e-49	1.27287e-37		-100	1.27287e-37	2.84136e-34		-100	2.84136e-34	5.40092e-50		-100	5.40092e-50
						4.29	1.16354e-49		-100	1.16354e-49	7.24617e-38		-100	7.24617e-38	1.70816e-34		-100	1.70816e-34	2.60829e-50		-100	2.60829e-50
						4.3	5.73751e-50		-100	5.73751e-50	4.11745e-38		-100	4.11745e-38	1.0252e-34		-100	1.0252e-34	1.25672e-50		-100	1.25672e-50
						4.31	2.82299e-50		-100	2.82299e-50	2.33531e-38		-100	2.33531e-38	6.14287e-35		-100	6.14287e-35	6.04111e-51		-100	6.04111e-51
						4.32	1.38593e-50		-100	1.38593e-50	1.32208e-38		-100	1.32208e-38	3.6746e-35		-100	3.6746e-35	2.89727e-51		-100	2.89727e-51
						4.33	6.78917e-51		-100	6.78917e-51	7.47081e-39		-100	7.47081e-39	2.19446e-35		-100	2.19446e-35	1.3863e-51		-100	1.3863e-51
						4.34	3.31847e-51		-100	3.31847e-51	4.2138e-39		-100	4.2138e-39	1.30836e-35		-100	1.30836e-35	6.61789e-52		-100	6.61789e-52
						4.35	1.61847e-51		-100	1.61847e-51	2.37234e-39		-100	2.37234e-39	7.78757e-36		-100	7.78757e-36	3.15193e-52		-100	3.15193e-52
						4.36	7.87617e-52		-100	7.87617e-52	1.33314e-39		-100	1.33314e-39	4.62762e-36		-100	4.62762e-36	1.49771e-52		-100	1.49771e-52
						4.37	3.82447e-52		-100	3.82447e-52	7.47774e-40		-100	7.47774e-40	2.74531e-36		-100	2.74531e-36	7.10029e-53		-100	7.10029e-53
						4.38	1.85298e-52		-100	1.85298e-52	4.18661e-40		-100	4.18661e-40	1.62594e-36		-100	1.62594e-36	3.35829e-53		-100	3.35829e-53
						4.39	8.95813e-53		-100	8.95813e-53	2.33965e-40		-100	2.33965e-40	9.61383e-37		-100	9.61383e-37	1.58473e-53		-100	1.58473e-53
						4.4	4.32124e-53		-100	4.32124e-53	1.30507e-40		-100	1.30507e-40	5.67502e-37		-100	5.67502e-37	7.46083e-54		-100	7.46083e-54
						4.41	2.0799e-53		-100	2.0799e-53	7.26636e-41		-100	7.26636e-41	3.3444e-37		-100	3.3444e-37	3.5044e-54		-100	3.5044e-54
						4.42	9.98904e-54		-100	9.98904e-54	4.03826e-41		-100	4.03826e-41	1.96764e-37		-100	1.96764e-37	1.64223e-54		-100	1.64223e-54
						4.43	4.78684e-54		-100	4.78684e-54	2.24011e-41		-100	2.24011e-41	1.15572e-37		-100	1.15572e-37	7.67806e-55		-100	7.67806e-55
						4.44	2.28886e-54		-100	2.28886e-54	1.24034e-41		-100	1.24034e-41	6.77706e-38		-100	6.77706e-38	3.58148e-55		-100	3.58148e-55
						4.45	1.09203e-54		-100	1.09203e-54	6.85498e-42		-100	6.85498e-42	3.96741e-38		-100	3.96741e-38	1.66674e-55		-100	1.66674e-55
						4.46	5.1987e-55		-100	5.1987e-55	3.78155e-42		-100	3.78155e-42	2.31874e-38		-100	2.31874e-38	7.73873e-56		-100	7.73873e-56
						4.47	2.46945e-55		-100	2.46945e-55	2.08224e-42		-100	2.08224e-42	1.35293e-38		-100	1.35293e-38	3.58481e-56		-100	3.58481e-56
						4.48	1.17044e-55		-100	1.17044e-55	1.14442e-42		-100	1.14442e-42	7.88095e-39		-100	7.88095e-39	1.65675e-56		-100	1.65675e-56
						4.49	5.53535e-56		-100	5.53535e-56	6.27826e-43		-100	6.27826e-43	4.58311e-39		-100	4.58311e-39	7.6391e-57		-100	7.6391e-57
						4.5	2.61207e-56		-100	2.61207e-56	3.43786e-43		-100	3.43786e-43	2.66085e-39		-100	2.66085e-39	3.51417e-57		-100	3.51417e-57
						4.51	1.2299e-56		-100	1.2299e-56	1.87903e-43		-100	1.87903e-43	1.54227e-39		-100	1.54227e-39	1.61286e-57		-100	1.61286e-57
						4.52	5.77829e-57		-100	5.77829e-57	1.02513e-43		-100	1.02513e-43	8.9244e-40		-100	8.9244e-40	7.3853e-58		-100	7.3853e-58
						4.53	2.70878e-57		-100	2.70878e-57	5.58233e-44		-100	5.58233e-44	5.15557e-40		-100	5.15557e-40	3.37391e-58		-100	3.37391e-58
						4.54	1.26705e-57		-100	1.26705e-57	3.03425e-44		-100	3.03425e-44	2.9734e-40		-100	2.9734e-40	1.53778e-58		-100	1.53778e-58
						4.55	5.91367e-58		-100	5.91367e-58	1.6462e-44		-100	1.6462e-44	1.71202e-40		-100	1.71202e-40	6.99275e-59		-100	6.99275e-59
						4.56	2.75402e-58		-100	2.75402e-58	8.91479e-45		-100	8.91479e-45	9.84109e-41		-100	9.84109e-41	3.17247e-59		-100	3.17247e-59
						4.57	1.27974e-58		-100	1.27974e-58	4.81876e-45		-100	4.81876e-45	5.6475e-41		-100	5.6475e-41	1.43596e-59		-100	1.43596e-59
						4.58	5.93363e-59		-100	5.93363e-59	2.5999e-45		-100	2.5999e-45	3.23556e-41		-100	3.23556e-41	6.48458e-60		-100	6.48458e-60
						4.59	2.74514e-59		-100	2.74514e-59	1.40015e-45		-100	1.40015e-45	1.85063e-41		-100	1.85063e-41	2.92157e-60		-100	2.92157e-60
						4.6	1.26722e-59		-100	1.26722e-59	7.52642e-46		-100	7.52642e-46	1.05675e-41		-100	1.05675e-41	1.31325e-60		-100	1.31325e-60
						4.61	5.83696e-60		-100	5.83696e-60	4.0383e-46		-100	4.0383e-46	6.02421e-42		-100	6.02421e-42	5.88938e-61		-100	5.88938e-61
						4.62	2.68266e-60		-100	2.68266e-60	2.16275e-46		-100	2.16275e-46	3.42853e-42		-100	3.42853e-42	2.63505e-61		-100	2.63505e-61
						4.63	1.23024e-60		-100	1.23024e-60	1.15614e-46		-100	1.15614e-46	1.94803e-42		-100	1.94803e-42	1.17626e-61		-100	1.17626e-61
						4.64	5.62935e-61		-100	5.62935e-61	6.16893e-47		-100	6.16893e-47	1.105e-42		-100	1.105e-42	5.23856e-62		-100	5.23856e-62
						4.65	2.57023e-61		-100	2.57023e-61	3.28553e-47		-100	3.28553e-47	6.25758e-43		-100	6.25758e-43	2.32764e-62		-100	2.32764e-62
						4.66	1.17093e-61		-100	1.17093e-61	1.74662e-47		-100	1.74662e-47	3.53778e-43		-100	3.53778e-43	1.03184e-62		-100	1.03184e-62
						4.67	5.32272e-62		-100	5.32272e-62	9.26805e-48		-100	9.26805e-48	1.9968e-43		-100	1.9968e-43	4.56359e-63		-100	4.56359e-63
						4.68	2.41425e-62		-100	2.41425e-62	4.90878e-48		-100	4.90878e-48	1.12516e-43		-100	1.12516e-43	2.0137e-63		-100	2.0137e-63
						4.69	1.09264e-62		-100	1.09264e-62	2.59511e-48		-100	2.59511e-48	6.32961e-44		-100	6.32961e-44	8.86499e-64		-100	8.86499e-64
						4.7	4.93416e-63		-100	4.93416e-63	1.36941e-48		-100	1.36941e-48	3.55481e-44		-100	3.55481e-44	3.89365e-64		-100	3.89365e-64
						4.71	2.22329e-63		-100	2.22329e-63	7.2129e-49		-100	7.2129e-49	1.99313e-44		-100	1.99313e-44	1.7062e-64		-100	1.7062e-64
						4.72	9.99596e-64		-100	9.99596e-64	3.79212e-49		-100	3.79212e-49	1.11566e-44		-100	1.11566e-44	7.45928e-65		-100	7.45928e-65
						4.73	4.48433e-64		-100	4.48433e-64	1.98999e-49		-100	1.98999e-49	6.23462e-45		-100	6.23462e-45	3.25357e-65		-100	3.25357e-65
						4.74	2.00731e-64		-100	2.00731e-64	1.04235e-49		-100	1.04235e-49	3.47829e-45		-100	3.47829e-45	1.41585e-65		-100	1.41585e-65
						4.75	8.96558e-65		-100	8.96558e-65	5.44974e-50		-100	5.44974e-50	1.93732e-45		-100	1.93732e-45	6.14709e-66		-100	6.14709e-66
						4.76	3.99564e-65		-100	3.99564e-65	2.84402e-50		-100	2.84402e-50	1.07725e-45		-100	1.07725e-45	2.66267e-66		-100	2.66267e-66
						4.77	1.7768e-65		-100	1.7768e-65	1.48145e-50		-100	1.48145e-50	5.98008e-46		-100	5.98008e-46	1.15069e-66		-100	1.15069e-66
						4.78	7.88381e-66		-100	7.88381e-66	7.7026e-51		-100	7.7026e-51	3.3142e-46		-100	3.3142e-46	4.96131e-67		-100	4.96131e-67
						4.79	3.49043e-66		-100	3.49043e-66	3.99746e-51		-100	3.99746e-51	1.83371e-46		-100	1.83371e-46	2.13416e-67		-100	2.13416e-67
						4.8	1.54193e-66		-100	1.54193e-66	2.07075e-51		-100	2.07075e-51	1.01288e-46		-100	1.01288e-46	9.15914e-68		-100	9.15914e-68
						4.81	6.7967e-67		-100	6.7967e-67	1.0707e-51		-100	1.0707e-51	5.58557e-47		-100	5.58557e-47	3.92172e-68		-100	3.92172e-68
						4.82	2.98934e-67		-100	2.98934e-67	5.52591e-52		-100	5.52591e-52	3.07507e-47		-100	3.07507e-47	1.6753e-68		-100	1.6753e-68
						4.83	1.31189e-67		-100	1.31189e-67	2.84667e-52		-100	2.84667e-52	1.69014e-47		-100	1.69014e-47	7.1401e-69		-100	7.1401e-69
						4.84	5.74466e-68		-100	5.74466e-68	1.46375e-52		-100	1.46375e-52	9.274e-48		-100	9.274e-48	3.03606e-69		-100	3.03606e-69
						4.85	2.51002e-68		-100	2.51002e-68	7.51263e-53		-100	7.51263e-53	5.08033e-48		-100	5.08033e-48	1.28799e-69		-100	1.28799e-69
						4.86	1.09429e-68		-100	1.09429e-68	3.8487e-53		-100	3.8487e-53	2.7784e-48		-100	2.7784e-48	5.45139e-70		-100	5.45139e-70
						4.87	4.76031e-69		-100	4.76031e-69	1.96803e-53		-100	1.96803e-53	1.51697e-48		-100	1.51697e-48	2.30196e-70		-100	2.30196e-70
						4.88	2.06625e-69		-100	2.06625e-69	1.00449e-53		-100	1.00449e-53	8.26872e-49		-100	8.26872e-49	9.69804e-71		-100	9.69804e-71
						4.89	8.94898e-70		-100	8.94898e-70	5.11752e-54		-100	5.11752e-54	4.49965e-49		-100	4.49965e-49	4.07629e-71		-100	4.07629e-71
						4.9	3.86732e-70		-100	3.86732e-70	2.60236e-54		-100	2.60236e-54	2.44454e-49		-100	2.44454e-49	1.70939e-71		-100	1.70939e-71
						4.91	1.6676e-70		-100	1.6676e-70	1.32091e-54		-100	1.32091e-54	1.32586e-49		-100	1.32586e-49	7.15172e-72		-100	7.15172e-72
						4.92	7.17494e-71		-100	7.17494e-71	6.69226e-55		-100	6.69226e-55	7.17915e-50		-100	7.17915e-50	2.98522e-72		-100	2.98522e-72
						4.93	3.08027e-71		-100	3.08027e-71	3.38431e-55		-100	3.38431e-55	3.88087e-50		-100	3.88087e-50	1.24319e-72		-100	1.24319e-72
						4.94	1.31949e-71		-100	1.31949e-71	1.7083e-55		-100	1.7083e-55	2.09442e-50		-100	2.09442e-50	5.16525e-73		-100	5.16525e-73
						4.95	5.63984e-72		-100	5.63984e-72	8.60705e-56		-100	8.60705e-56	1.12844e-50		-100	1.12844e-50	2.14112e-73		-100	2.14112e-73
						4.96	2.40532e-72		-100	2.40532e-72	4.32854e-56		-100	4.32854e-56	6.06976e-51		-100	6.06976e-51	8.85494e-74		-100	8.85494e-74
						4.97	1.02358e-72		-100	1.02358e-72	2.17282e-56		-100	2.17282e-56	3.25944e-51		-100	3.25944e-51	3.65364e-74		-100	3.65364e-74
						4.98	4.3463e-73		-100	4.3463e-73	1.08869e-56		-100	1.08869e-56	1.74741e-51		-100	1.74741e-51	1.50404e-74		-100	1.50404e-74
						4.99	1.84145e-73		-100	1.84145e-73	5.44478e-57		-100	5.44478e-57	9.35243e-52		-100	9.35243e-52	6.17716e-75		-100	6.17716e-75
						5	7.78478e-74		-100	7.78478e-74	2.71802e-57		-100	2.71802e-57	4.99727e-52		-100	4.99727e-52	2.53112e-75		-100	2.53112e-75

## Sheet: Tables
Year	Variation	Source / Publisher	T 1.0	T 0.2	TP 0.5	TP 0.1		Nr.	Access to the publication	Researchgate	Pdf via Google	WoS (06 Mrt 2024)	Year	Variation	Source / Publisher
1991	VRIO framework	Journal of Management	X	X	X	X		15	Subscription based	Yes, on request	Yes	25821	1991	VRIO framework	Journal of Management
2006	Quantitative SWOT analysis	Journal of Engineering Design	X	X	X	X		31	Subscription based	Yes, on request	Yes	404	2007	ANP-SWOT	Information Sciences
2007	Fuzzy SWOT	Journal of Intelligent and Fuzzy Systems	X	X	X	X		07	Subscription based	No	No	395	1975	Treat/Opportunity analysis	California Management Review
2003	S-O-S approach	Journal of Environmental Management	X	X				10	Subscription based	No	Yes	381	1982	TOWS matrix	Long Range Planning
1982	TOWS Matrix	Long Range Planning		X	X			47	Subscription based	Yes	No	177	2017	SMART SWOT	International Journal of Contemporary Hospitality Management
1993	SWOPT	West Publishing Company			X			Table X: Availability of scholarly information on the history of SWOT analysis									Tabel 1:
2019	Importance/Performance Analysis	International Journal of Information Management			X
Table 1: Best scoring SWOT variations according to variable settings (5/5 points)								Nr.	Access to the publication	Researchgate	Pdf via Google	Variation
								15	Subscription based	Yes, on request	Yes	VRIO framework
Nr.	Historical accuracy	Explanation	T 1.0	T 0.2	TP 0.5	TP 0.1		31	Subscription based	Yes, on request	Yes	ANP-SWOT
1	Robert F. Stewart	First published SOFT approach (Stewart et al., 1965)	0	0	0	0		07	Subscription based	No	No	Treat/Opportunity analysis
2	Albert S. Humphrey	Worked at the core TAPP group at SRI	0.3	0.24	0.22	0.24		10	Subscription based	No	Yes	TOWS matrix
3	Stanford Research Institute	Famous US Research Institute	0.16	0.16	0.16	0.12		47	Subscription based	Yes	No	SMART SWOT
4	Fortune 500 companies	Subscribers to the Long Range Planning Service at SRI	0.02	0.04	0.08	0.06
5	SOFT approach	The original SWOT analysis	0	0	0.02	0
Table 2: Spontenious historical accuracy in the responses according to variable settings
Nr.	SWOT training sources	Title & authors
1	Rapidbi.com	History of SWOT analaysis (Morrison, 2016)
2	TAM UK via Linkedin	From the author of SWOT analysis (Webb, 2015)
3	Marketingteacher Ltd	SWOT analysis (Friesner, 2011)
4	Businessballs Ltd	SWOT Analysis (Businessballs.com, 2011)
Table 3: Potential training sources for ChatGPT 4 regarding the history of SWOT analysis

## Sheet: Table 1
Nr.	Variation	Year	WoS	Source / Publisher
1	VRIO framework	1991	25821	Journal of Management
2	ANP-SWOT	2007	404	Information Sciences
3	Treat/Opportunity analysis	1975	395	California Management Review
4	TOWS matrix	1982	381	Long Range Planning
5	SMART SWOT	2017	177	Int. Journal of Cont. Hosp. Mgt.
Table 1: Top 5 most popular SWOT variations in the literature (1980 -2020)

## Sheet: Table 2
Nr.	Variation	ResearchGate	Pdf via Google	Access to paper
1	VRIO framework	Request	Yes	Subscription-based
2	ANP-SWOT	Request	Yes	Subscription-based
3	Threat/Opportunity analysis	No	No	Subscription-based
4	TOWS matrix	No	Yes	Subscription-based
5	SMART SWOT	Yes	No	Subscription-based
Table 2: Availability of the top 5 most popular SWOT variations in the literature (1980 -2020)

## Sheet: Table 3
Nr.	References found in the data	T 1.0	T 0.2	TP 0.5	TP 0.1
1	Robert F. Stewart	0	0	0	0
2	Albert S. Humphrey	0.3	0.24	0.22	0.24
3	Stanford Research Institute	0.16	0.16	0.16	0.12
4	Long Range Planning Service	0.02	0.04	0.08	0.06
5	SOFT approach (the original SWOT analysis)	0	0	0.02	0
Table 3: Spontaneous historical accuracy in the responses to different variable settings

## Sheet: Table 4
Nr.	Variation	Year	T 1.0	T 0.2	TP 0.5	TP 0.1
1	VRIO framework	1991	X	X	X	X
2	ANP-SWOT	2007	X	X	X	X
3	Threat/Opportunity analysis	1975	X	X	X	X
4	TOWS matrix	1982	X	X
5	SMART SWOT	2017		X	X
6	SWOPT	1993			X
7	Importance/Performance Analysis	2019			X
Table 4: Best scoring SWOT variations according to different variable settings (5/5 points)

[truncated: 2 more sheets: Table 5, Websites]
